# Supplementary material for: The transmission of pottery technology among prehistoric European hunter-gatherers
Source: PubMed Central journal article supplement (PMC9957732; doi:10.1038/s41562-022-01491-8), 2022-12-22
Supplement: 41562_2022_1491_MOESM1_ESM.pdf [file 41562_2022_1491_MOESM1_ESM.pdf]

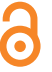

# The transmission of pottery technology among prehistoric European hunter-gatherers

---

In the format provided by the authors and unedited

## Contents

|                                                                                                            |           |
|------------------------------------------------------------------------------------------------------------|-----------|
| <b>Supplementary Methods</b>                                                                               | <b>3</b>  |
| Background to dating and spatiotemporal regression models                                                  | 3         |
| Site chronologies: methods                                                                                 | 3         |
| Estimating diffusion rate                                                                                  | 4         |
| Predicting arrival time                                                                                    | 4         |
| Phylogenetic analyses                                                                                      | 5         |
| Spatial modelling of the $\Delta^{13}\text{C}$ values                                                      | 5         |
| <b>Supplementary Results</b>                                                                               | <b>6</b>  |
| Site chronology for Kairshak III                                                                           | 6         |
| Site chronology for Baibek                                                                                 | 6         |
| Site chronology for Algay                                                                                  | 6         |
| Site chronology for Cherkasskaya 5                                                                         | 7         |
| Site chronology for Rakushechny Yar                                                                        | 7         |
| Site chronology for Zamostje 2                                                                             | 8         |
| Site chronology for Zvidze                                                                                 | 8         |
| Spatial temporal regression results                                                                        | 9         |
| Mantel test results on regional subsets of the data                                                        | 9         |
| Mantel test results for strictly ‘Early Neolithic’ vessels                                                 | 10        |
| Phylogenetic analyses                                                                                      | 10        |
| <b>Supplementary Figures</b>                                                                               | <b>11</b> |
| <b>Supplementary Tables</b>                                                                                | <b>23</b> |
| Supplementary Table 1: Sites in the study                                                                  | 23        |
| Supplementary Table 2: New and/or previously unpublished $^{14}\text{C}$ results                           | 29        |
| Supplementary Table 3: previously-published $^{14}\text{C}$ ages used in chronological models              | 36        |
| Supplementary Table 4: Estimated average rates of transmission                                             | 39        |
| Supplementary Table 5: Modelled front speeds in archaeological case studies                                | 40        |
| Supplementary Table 6: Pottery traits                                                                      | 40        |
| Supplementary Table 7: 95% confidence interval for Mantel correlation coefficients and associated p-values | 47        |
| Supplementary Table 8: Distribution of Jaccard distances (interquartile range)                             | 48        |
| Supplementary Table 8: Mantel test coefficients with vessels as the unit of analysis                       | 48        |
| Supplementary Table 9: Mantel test coefficients limited to major regions                                   | 49        |
| Supplementary Table 10 : Mantel test coefficients stratified by vegetation zone                            | 49        |
| Supplementary Table 11 : Mantel test coefficients for earliest forms only                                  | 50        |

## Supplementary Methods

### Background to dating and spatiotemporal regression models

The methods we use to measure diffusion rate and make predictions for the arrival time of pottery follow the results of Silva and Steele <sup>1,2</sup>, who demonstrated that distance measurements along least cost paths produce a spatio-temporal regression model that fits the archaeological data very well in the case of the spread of the Neolithic across Western Europe. Jordan et al <sup>3</sup> used similar techniques to examine early pottery use across the entire Afro-Eurasian landmass, where dated occurrences of pottery from across the landmass were used to predict an ‘arrival time’ for any point in the landscape. Our study differs from previous work because we combine prior information and radiocarbon dates in Bayesian models of the ‘start’ date for the early phase of pottery use at a small number of sites where radiocarbon measurements from samples of atmospheric carbon (i.e. without the complicating effects of freshwater carbon reservoirs) can be stratigraphically associated with early pottery. The posterior probability distribution of the ‘start’ of pottery at each site is then used to parameterize a regression between distance and time. The distance between each site and a putative origin is determined using a ‘least cost path’ (LCP) algorithm (details of the script used are given digitally in the electronic repository of code and data; see [doi.org/10.5281/zenodo.6619101](https://doi.org/10.5281/zenodo.6619101)). The utility of this approach depends on how the modelling process plays out. If the model and data fit, we should be able to see a straight-line regression between time and distance, implying that there is a wave front moving across the landscape that carries with it the knowledge of pottery manufacture. We can gain multiple perspectives on the wavefront by considering each site as an origin point where earlier sites have ‘negative’ distance, and later sites a ‘positive’ distance. This removes any dependence on an absolute point of origin for the study region, which in any case is rather moot as the traditions can be traced back to the Far East.

### **Site chronologies: methods**

To anchor the distance-time regression, we estimate the date of the first pottery at seven sites between the Caspian and the Baltic, using simple Bayesian chronological models implemented in OxCal 4.4<sup>4</sup>. These models (Supplementary Figures 1–7) use only calibrated <sup>14</sup>C dates from fully terrestrial species (herbivore bones, and occasionally wood charcoal or plant macrofossils). The main interpretative challenge, when relying on dates of bones and plant remains, is assessing whether pottery was exactly contemporaneous with these materials, particularly when the dates of terrestrial samples span several centuries. Each site chronology depends on at least 9 calibrated dates, which is enough to allow detection of outliers if the occupation was short-lived. In one case, Cherkasskaya 5, our model suggests that an equid tooth, precisely dated by two laboratories using accelerator mass spectrometry (AMS), is 100–200 years older than the other 8 samples, and can be omitted from the phase of occupation in which pottery was deposited. Elsewhere, the relevance of less precise early radiometric dates on terrestrial material is more ambiguous (see Kairshak III, Algay). Nevertheless, the seven sites discussed here are those with the most robust <sup>14</sup>C chronologies, if not necessarily the oldest sites with pottery in each region. Each model's start Boundary provides a probability distribution for the date at which pottery first appeared at that site.

### **Estimating diffusion rate**

We undertook linear regression between distance and time using several methods to obtain a range of plausible values for the rate of diffusion of pottery. Distance measurements are the length of the least-cost path between these locations, derived from the analysis of a 100m digital elevation model of Eurasia, the ASTER Global DEM v3<sup>23</sup>, using the *r.cost* and *r.drain* algorithms in GRASS GIS<sup>24</sup>. Using the scripts presented elsewhere in the supplementary information we use both reduced major axis regression (RMA) and ordinary least-squares (OLS) regression to undertake the analysis, employing the R *lmodel2* package for RMA<sup>25</sup>.

### **Predicting arrival time**

To use this modelling approach to predict arrival time, we then set up a grid over the landscape and run the least cost path analysis again from each point in that grid, and extrapolate through these results using a thin plate spline regression in the GIS. This produces a raster containing an

estimate of the cost distance for each point in the landscape. Next using straightforward raster algebra, can be parameterized with the results of the space time regression:

$$T = T_0 + D/r$$

Where  $T$  is the raster of predicted arrival dates,  $T_0$  is the date at the point of origin,  $r$  is the gradient of the diffusion rate regression in  $\text{km yr}^{-1}$ ,  $D$  is the cost-distance raster generated by the thin plate spline regression, equal to zero at the point of origin. The resulting surface  $T$  contains an array of pixels, each one predicting the year we could expect pottery to first occur. The terms  $T_0$  and  $r$  have associated uncertainty that can be used to generate an error map using the same process.

### **Phylogenetic analyses**

To investigate what kind of historic signals might be embedded in the pottery trait data, we applied phylogenetic network analysis<sup>33</sup>. Our goal here was to determine whether the data represent evolutionary patterns of branching, where cultural traits gradually differentiate, or blending, where different traits merge and recombine to form culturally recognisable entities. We were also interested in whether there was any empirical basis for inferring cladal relationships between site assemblages that have been well dated. Whilst the full dataset is too large to analyse in this manner, we employed from the eight sites where the pottery arrival times were more robustly established.

### **Spatial modelling of the $\Delta^{13}\text{C}$ values**

A local average model (AverageR) available in *IsoMemo 1.9.13* (available from <https://www.isomemoapp.com/>), developed within the IsoMemo and Pandora initiative, was used to generate a spatial modelling of the  $\Delta^{13}\text{C}$  values. AverageR is a generalised additive mixed model that uses a thin plate regression spline<sup>34</sup>. The model used for each sample the  $\Delta^{13}\text{C}$  ( $\text{C}_{18:0}-\text{C}_{16:0}$ ) values, the combined uncertainties of the isotopic measurement and the site attribution used as a random intercept to capture dependencies within one site.

# Supplementary Results

## Site chronology for Kairshak III

Kairshak III is one of several sites in the North Caspian plain, close to the mouth of the River Volga, where early Neolithic ‘Kairshakskaya’-type pottery has been found. Seven herbivore bones (mainly kulan, *Equus hemionus kulan*), were newly dated (Supplementary Table 2) to complement the 4 legacy bone dates (Supplementary Table 3). All 8 AMS  $^{14}\text{C}$  dates on animal bone, and 2 of the 3 radiometric bone dates, are compatible with a brief occupation episode in the early 6th millennium cal BC (Supplementary Figure 1). One radiometric bone date is a statistical outlier and has been excluded from the chronological model, which suggests that pottery only appeared here shortly after 5900 cal BC, notwithstanding a number of  $^{14}\text{C}$  ages on the total organic carbon content (TOCC) of pottery, which when calibrated correspond to dates in the mid-7th millennium (Meadows, Dolbunova et al. in prep.).

## Site chronology for Baibek

Recent excavations at Baibek, another site with Kairshakskaya pottery, revealed several structures attributed to a single phase of occupation <sup>5</sup>. All 32 of the newly obtained AMS  $^{14}\text{C}$  dates on herbivore bones (Supplementary Table 2) are compatible with a brief occupation at around 5950 or 5900 cal BC (Supplementary Figure 2). Nine of the ten legacy radiometric dates on bones are consistent with this chronology, and one appears to be marginally later. Bulk charcoal radiometric dates also fit the short chronology. Food crust and TOCC  $^{14}\text{C}$  ages corresponding to calibrated dates in the late 7th millennium are therefore assumed to be misleading (Meadows, Dolbunova et al. in prep.).

## Site chronology for Algay

Five new AMS dates on herbivore bones (Supplementary Table 2) and 12 legacy dates on bones and charcoals (Supplementary Table 3), including a stratified sequence of 9 samples and an AMS

date on a horse bone (Supplementary Figure 3), span several centuries in the mid-late 6th millennium. Three radiometric dates on unidentified bones appear to fall in the later 7th and/or earlier 6th millennia. A similar situation, in which one or more radiometric dates on terrestrial material appear to be centuries earlier than a much larger number of AMS dates, also occurs at Varfolomeevka and Oroshemoe, the other two sites with early Neolithic Orlovskaya-type pottery and significant numbers of  $^{14}\text{C}$  dates (Meadows, Dolbunova et al. in prep.). Our Algay model (Supplementary Figure 3) disregards these early dates, which are not corroborated by stratigraphic sequences <sup>6</sup> and which are identified as outliers using OxCal's Outlier\_Model functions <sup>7</sup>, presumably either because the dates are inaccurate, or because the bones are not associated with the main period of occupation. Pottery appeared at Algay at a depth of 147–130cm, at the base of a stratigraphic sequence also dated by SPb-1510 <sup>8</sup>.

### **Site chronology for Cherkasskaya 5**

The chronological model for the brief early Neolithic occupation at Cherkasskaya 5, on the Middle Don, is based on AMS dates for 9 herbivore bones or teeth (Supplementary Table 3). One of these is a statistical outlier and is regarded as residual, leading to an estimated date for the appearance of pottery in the 59th century cal BC <sup>10</sup> (Supplementary Figure 4).

### **Site chronology for Rakushechny Yar**

Rakushechny Yar, on the Lower Don, was long regarded as an importantly early site for Neolithic pottery in Eastern Europe, mainly on the basis of food-crust dates that are almost certainly misleadingly early, due to the persistent use of pottery to process fish and other aquatic species <sup>11</sup>. Out of the 50 bones or teeth of terrestrial herbivores that have now been dated from layers with the earliest pottery (Supplementary Tables 2 and 3), only one (SPb-729, 7970±110 BP, 7190–6590 cal BC) is necessarily older than c.5600 cal BC, and it is so much older that we do not regard it as relevant to the chronology of early pottery (Supplementary Figure 5). A more detailed chronological model, which also includes legacy  $^{14}\text{C}$  data and results from new samples with  $^{14}\text{C}$  reservoir effects, is in preparation.

### **Site chronology for Zamostje 2**

Well over 100  $^{14}\text{C}$  ages are available from the waterlogged site, Zamostje 2, spanning three late-final aceramic Mesolithic layers and Early (Upper Volga pottery) and Middle (Lyalovskaya pottery) Neolithic layers. A large proportion of these are radiometric dates for vertical timbers (which are not associated stratigraphically with a specific layer) or bulk organic sediment (which may have contained redeposited, intrusive or aquatic plants). Many of the AMS dates are on pottery food-crusts, some of which have been shown to contain aquatic ingredients<sup>12</sup> and thus to be misleadingly old<sup>13</sup>. Several horizontally bedded fish traps and wood fragments, and charred plant macrofossils attached to 3 undecorated sherds of Upper Volga pottery (Supplementary Tables 2 and 3) provide enough reliable dates to date the start of the (surviving) Early Neolithic layer to the 56th century cal BC (Supplementary Figure 6). A more detailed chronological model, incorporating all known  $^{14}\text{C}$  ages, is in preparation.

### **Site chronology for Zvidze**

At Zvidze, the AMS date of an alder (*Alnus* sp.) charcoal fragment embedded in a potsherd from the earliest Neolithic layer provides a terminus post quem for that sherd, and implicitly for the start of pottery production locally<sup>14</sup> (Supplementary Table 3). Although animal bones from the 1980s excavations are preserved, it was not possible to assign them unambiguously to Mesolithic or Neolithic contexts. However, the legacy radiometric dates on wood and peat<sup>15,16</sup> (Supplementary Table 3) are compatible with the stratigraphic sequence<sup>17</sup> and with the AMS date for the potsherd. The resulting chronological model (Supplementary Figure 7) supports the view that pottery first appeared in eastern Latvia by c.5400 cal BC.

### **Spatial temporal regression results**

Regressions were run multiple times using different samples of the posterior probability distributions of the chronological model of the start date at each of the sites in order to fairly incorporate chronological uncertainty (Supplementary Figure 8). RMA models produced slightly



faster diffusion rates than OLS models (Supplementary Figure 9). The modelled diffusion rates from both methods are given in Supplementary Table 4.

An obvious limitation of this analysis is that when sites are excavated, we cannot necessarily expect to find in every case the earliest, or even a relatively early, occurrence of pottery for each locality. This is especially true if pottery forms are used for a long time in each locale. We have at least one site – Rakushechny Yar – which does not really fit a diffusion model of the spread of pottery into the region. This is to be expected for some sites and this gives us new insight into the site itself and a new way to interpret its chronology.

Compared to other modelled or measured cases of archaeological diffusion, we find that the spread of early hunter-gatherer pottery in Europe was a rapid movement, up to 10km per year. This is much faster, for example, than the spread of pottery in Central-Western Europe, as various different studies using a selection of methodologies have shown (Supplementary Table 5).

### **Mantel test results on regional subsets of the data**

In the southwest of our study area, around the northern shores of the Caspian Sea and in the catchments of the Don and Volga Rivers, the organic residues are indeed strongly correlated with technology, morphology and decoration. Moving westwards, pottery finds from the Upper Dnieper and Bug-Dniester plains (modern-day Ukraine and southern Belarus) have weaker correlations but these are still significant, aside from the absence of any significant relationship between use and decoration (Supplementary Table 9). In the northern regions, strong correlations are observed across the datasets, albeit weakly in the case of residues and decoration in the north-eastern part of our study area. Sites in the Baltic and across the western half of the study area show correlations between geographic distance and technology, which is absent in the east half, perhaps reflecting a more homologous pattern of manufacturing traditions such as the characteristic use of shell temper for Narva pottery and organic tempers for Neman pottery for example. Correlations between technology, morphology, decoration and use also present themselves when the sample is stratified by vegetation zone; in Taiga the smaller number of sites

and pottery finds reduces the statistical power of the sample but a significant correlation is nonetheless observed between morphology and organic residues (Supplementary Table 10). The small number of sites in desert biomes precludes undertaking this analysis separately for them.

### Mantel test results for strictly ‘Early Neolithic’ vessels

We also performed the analysis on a subset of the data involving pots (917 vessels) that are identifiably ‘Early Neolithic’, i.e. excluding later/developed forms and also the various cultures of the western Baltic. The results are similar to the overall dataset (Supplementary Table 11). Using a partial Mantel test, a combination of all pottery traits against residues, holding distance constant, produces a Mantel  $r$  of 0.29 (95% C.I. 0.25 to 0.32,  $p \sim 0.001$ ).

## Supplementary Figures

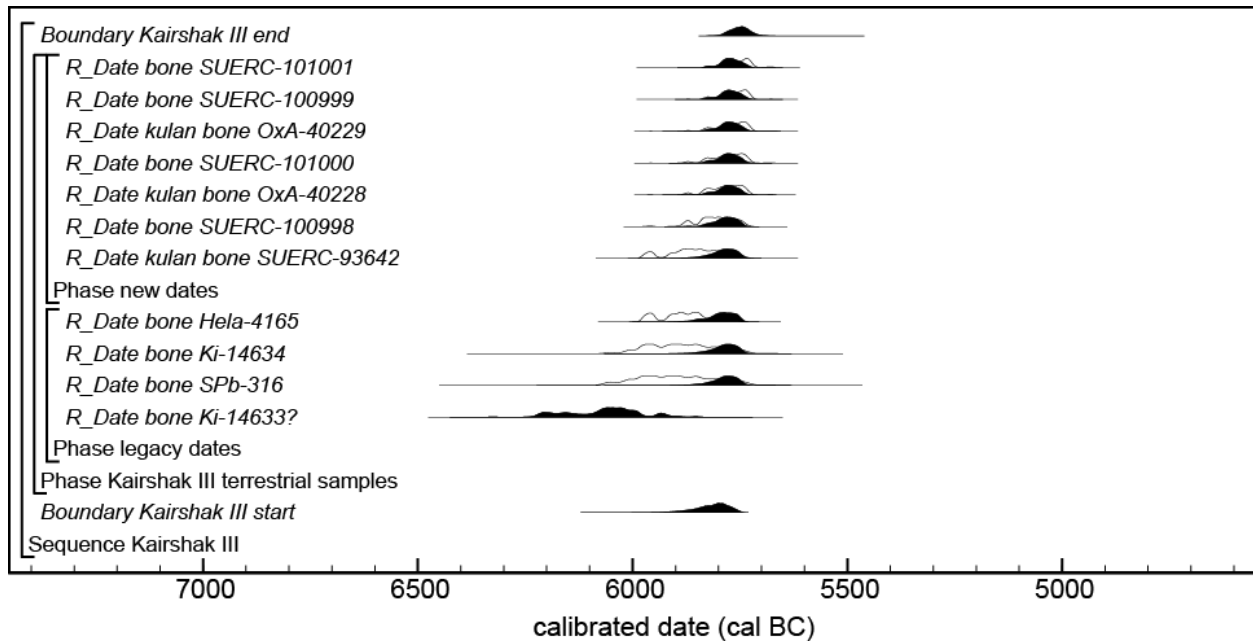

**Supplementary Figure 1:** Chronological model of the early Neolithic occupation of Kairshak III, showing two probability distributions for the calendar date of each sample: in outline, that obtained by

simple calibration of the  $^{14}\text{C}$  age, using the IntCal20 calibration curve (Reimer et al. 2020); in black, the model's posterior density estimate of the sample date. Ki-14633 is omitted from the model (as indicated by '?'), and only the simple calibration (black distribution) of this result is shown. The model structure assumes that the dated samples represent a single, uniform phase of deposition with start and end boundaries, whose dates are calculated based on the scatter of calibrated dates (Bronk Ramsey 2009a). The boundary *Kairshak III start* is regarded as the date of the first pottery at this site.

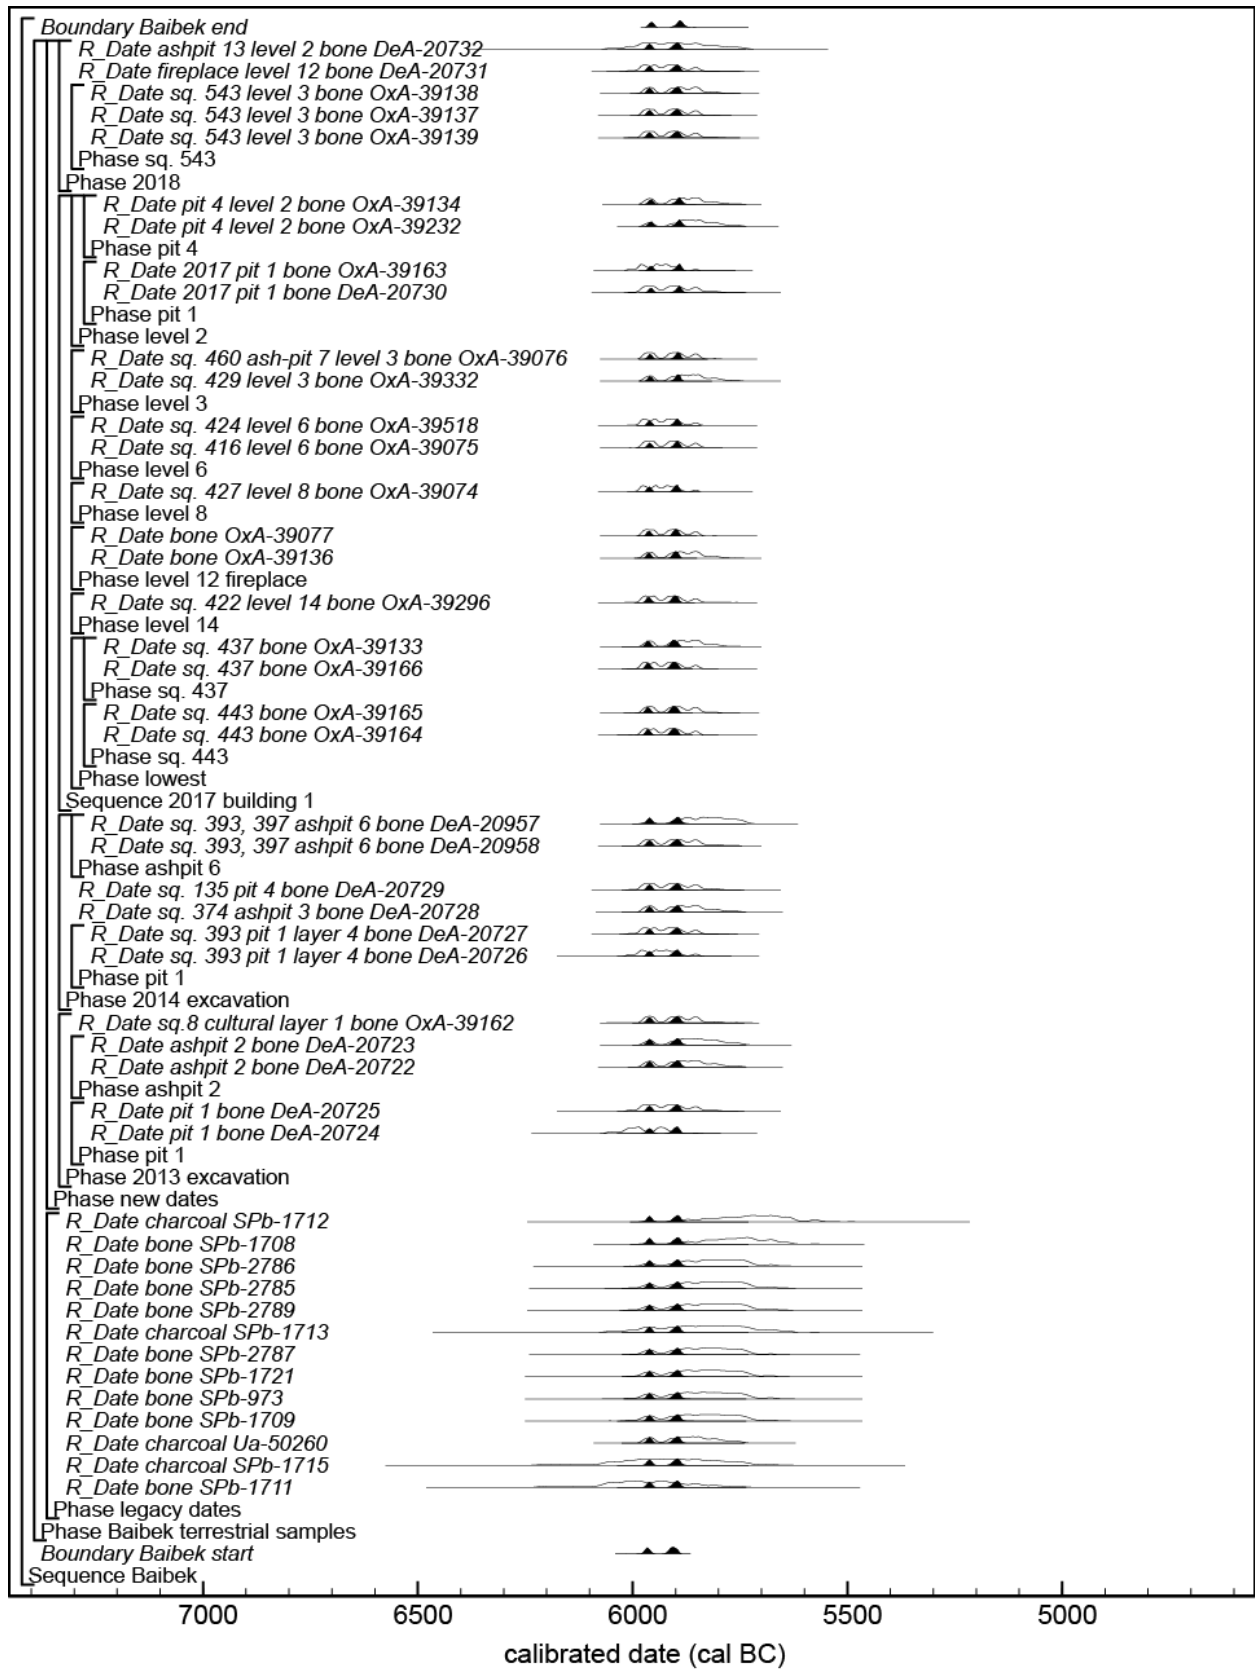

(previous page) **Supplementary Figure 2:** Chronological model of the early Neolithic occupation of Baibek, with the same format as Supplementary Figure 1. SPb-1708 and SPb-1712 are omitted from the model, as they are appreciably later than the rest of the results. The stratigraphic sequence in building 1 of the 2017 excavation <sup>5</sup> is used to order the dates of samples concerned. Duplicate 14C measurements on the same skeletal element have been combined before calibration.

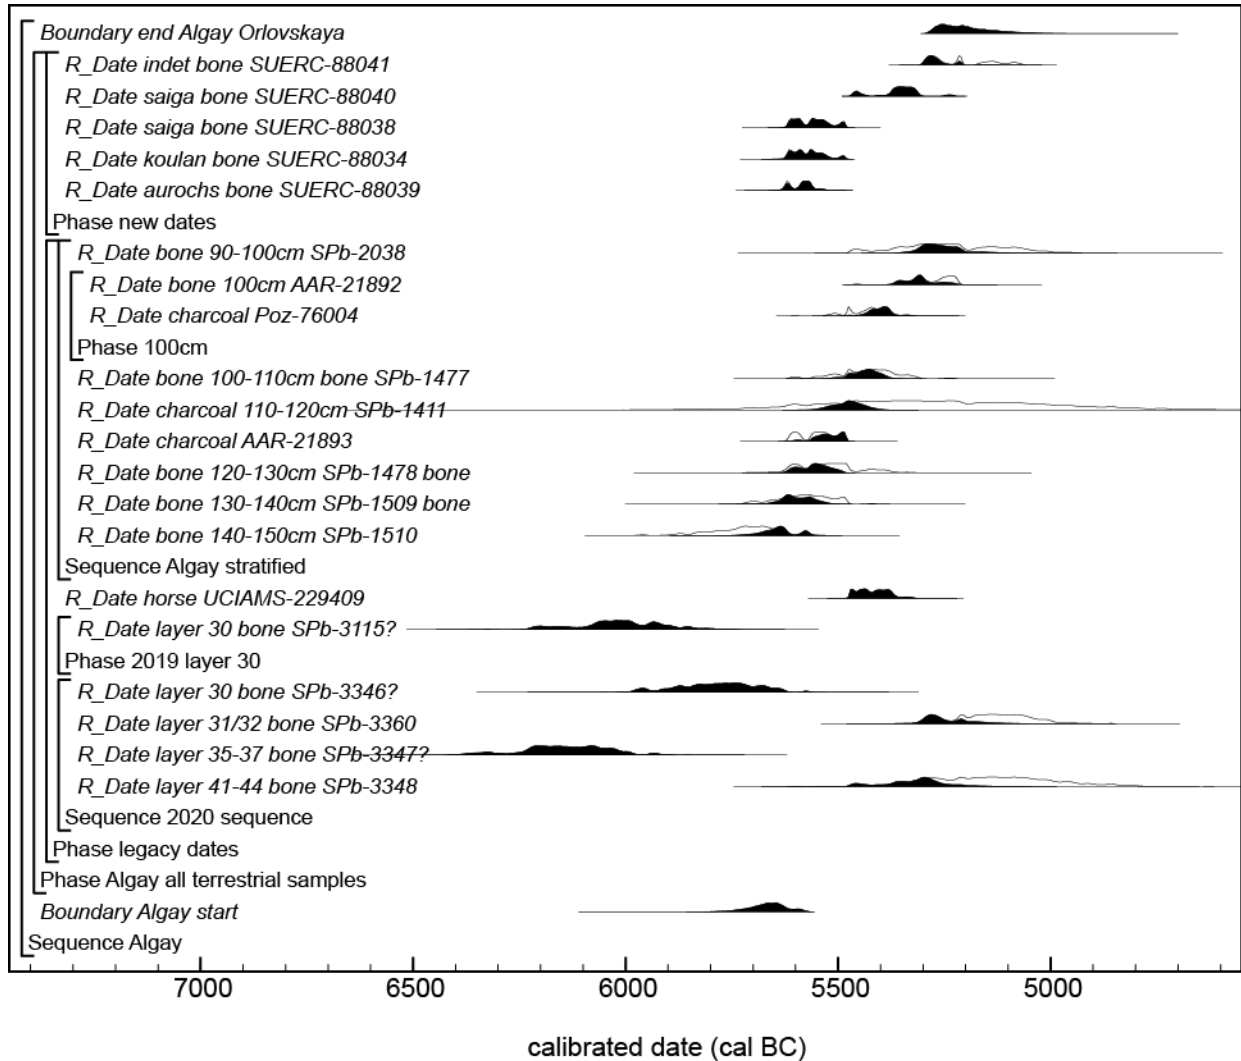

**Supplementary Figure 3:** Chronological model of the early Neolithic occupation of Algay, with the same format as Supplementary Figure 1. SPb-3115, SPb-3346 and SPb-3347 are omitted from the model, as they appear to be significantly earlier than other results, with unsatisfactory individual indices of agreement (Bronk Ramsey 2009a). The stratigraphic sequence is used to order the dates of samples concerned <sup>9</sup>.

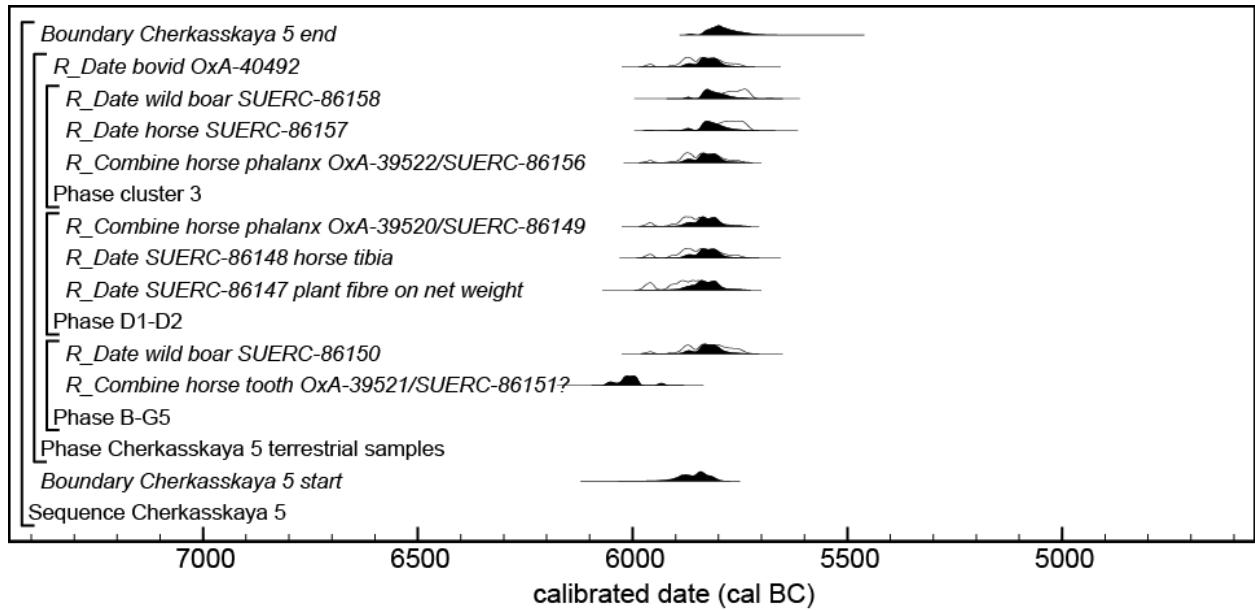

**Supplementary Figure 4:** Chronological model of the early Neolithic occupation of Cherkasskaya 5, with the same format as Supplementary Figure 1. Duplicate 14C measurements on the same skeletal element have been combined before calibration.

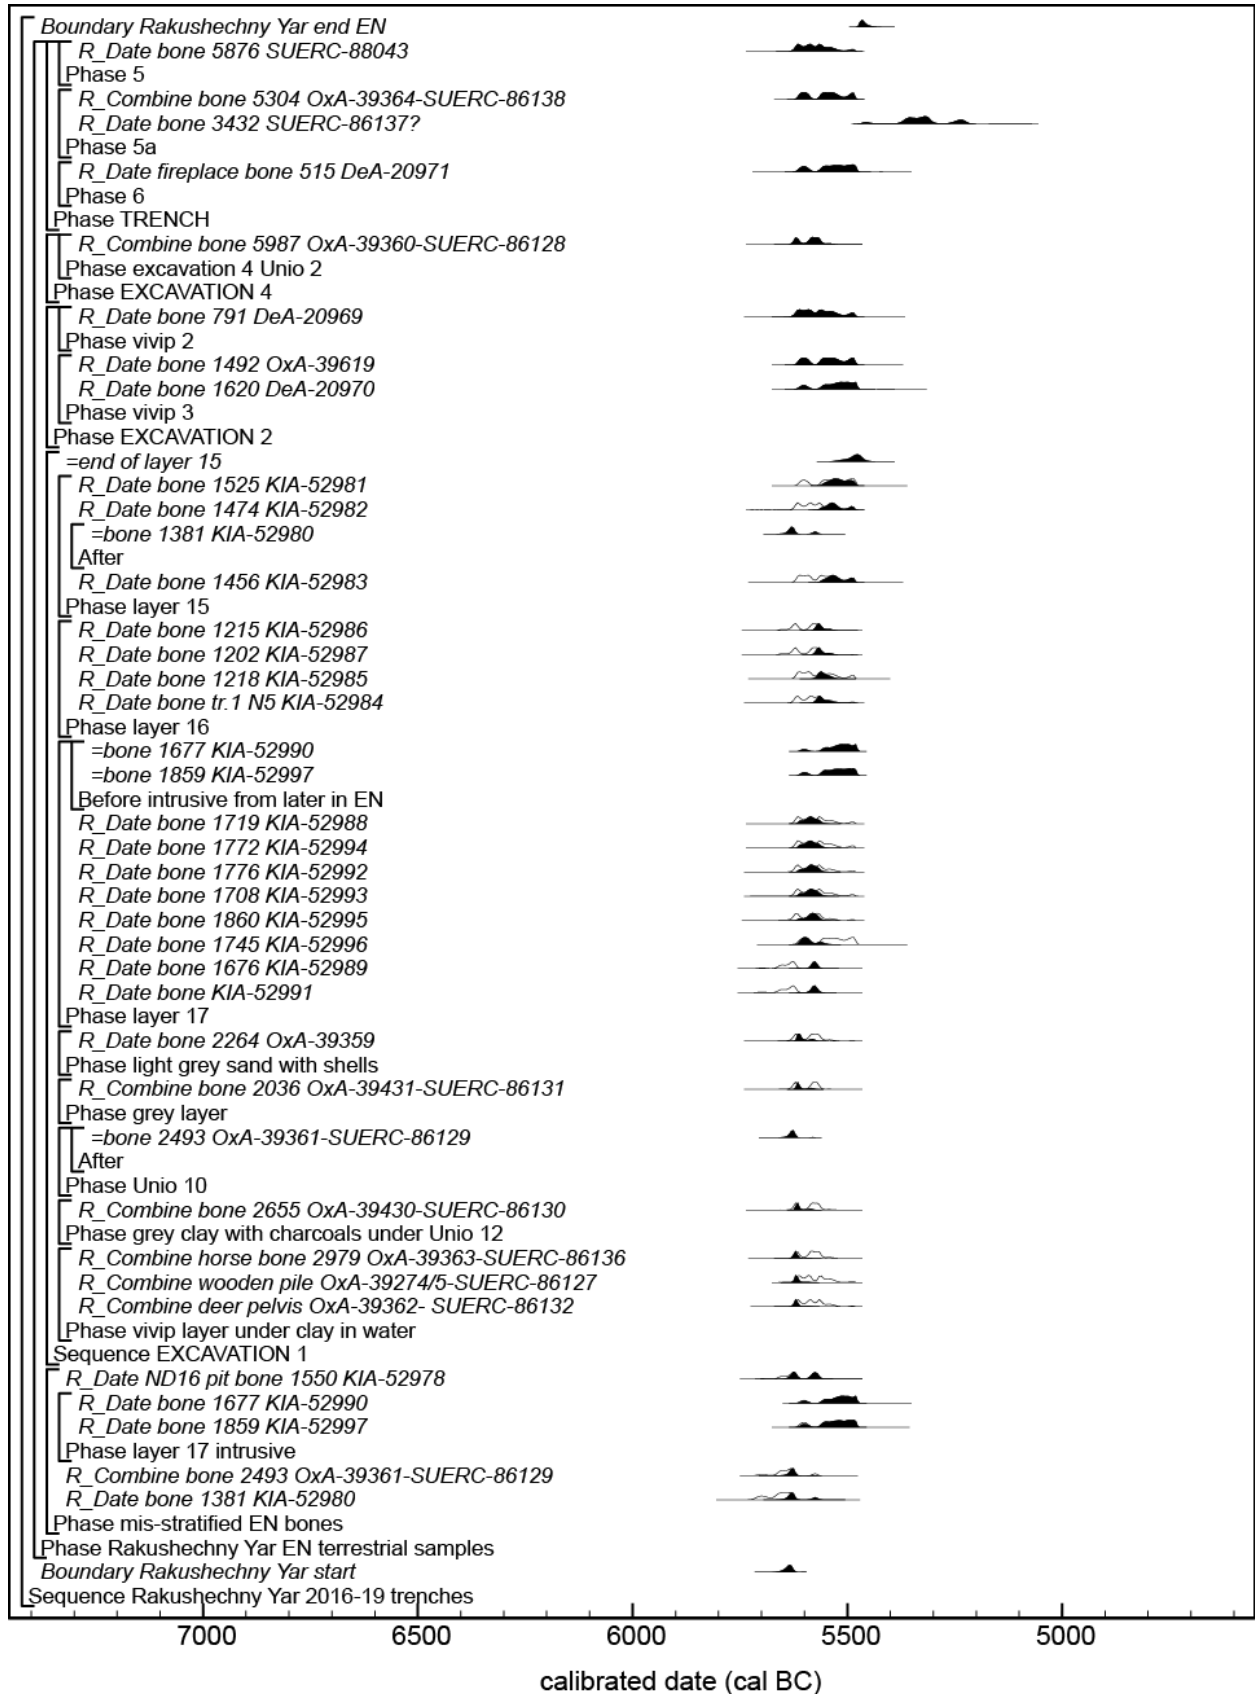

(previous page) **Supplementary Figure 5:** Chronological model of the early Neolithic occupation of Rakushechny Yar, with the same format as Supplementary Figure 1. Stratigraphic sequences from the 2016-19 excavations have been used to order the dates of samples. Duplicate 14C measurements on the same skeletal element or branch have been combined before calibration.

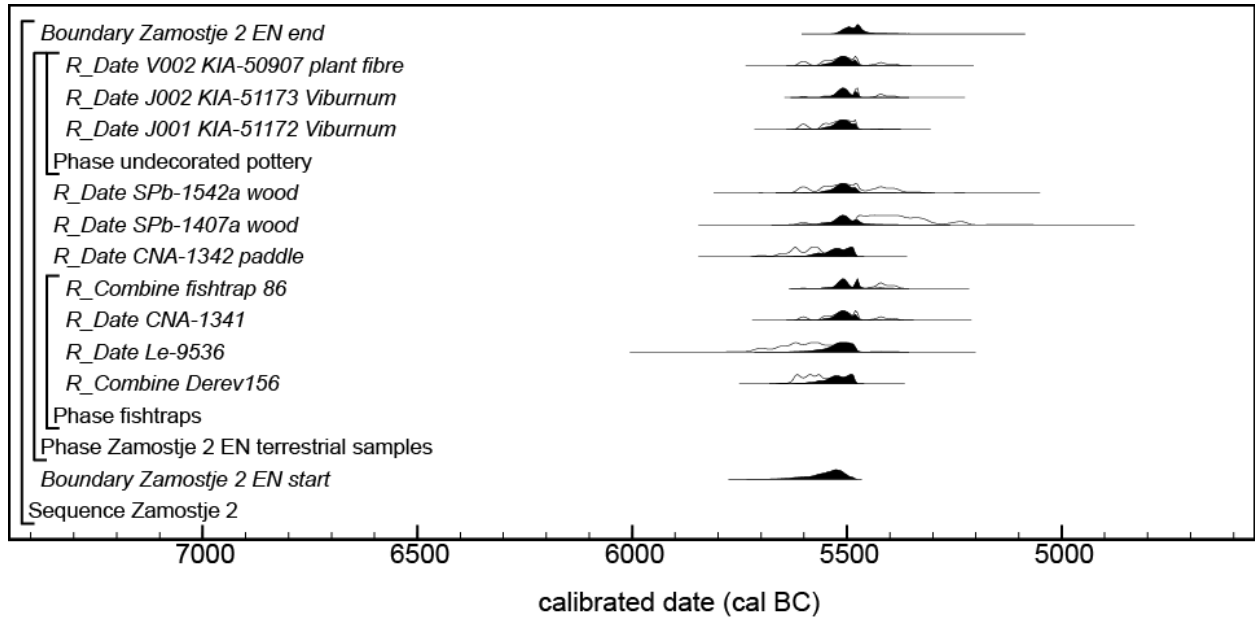

**Supplementary Figure 6:** Chronological model of the early Neolithic occupation of Zamostje 2, with the same format as Supplementary Figure 1. Duplicate 14C measurements on the same fish-trap have been combined before calibration.



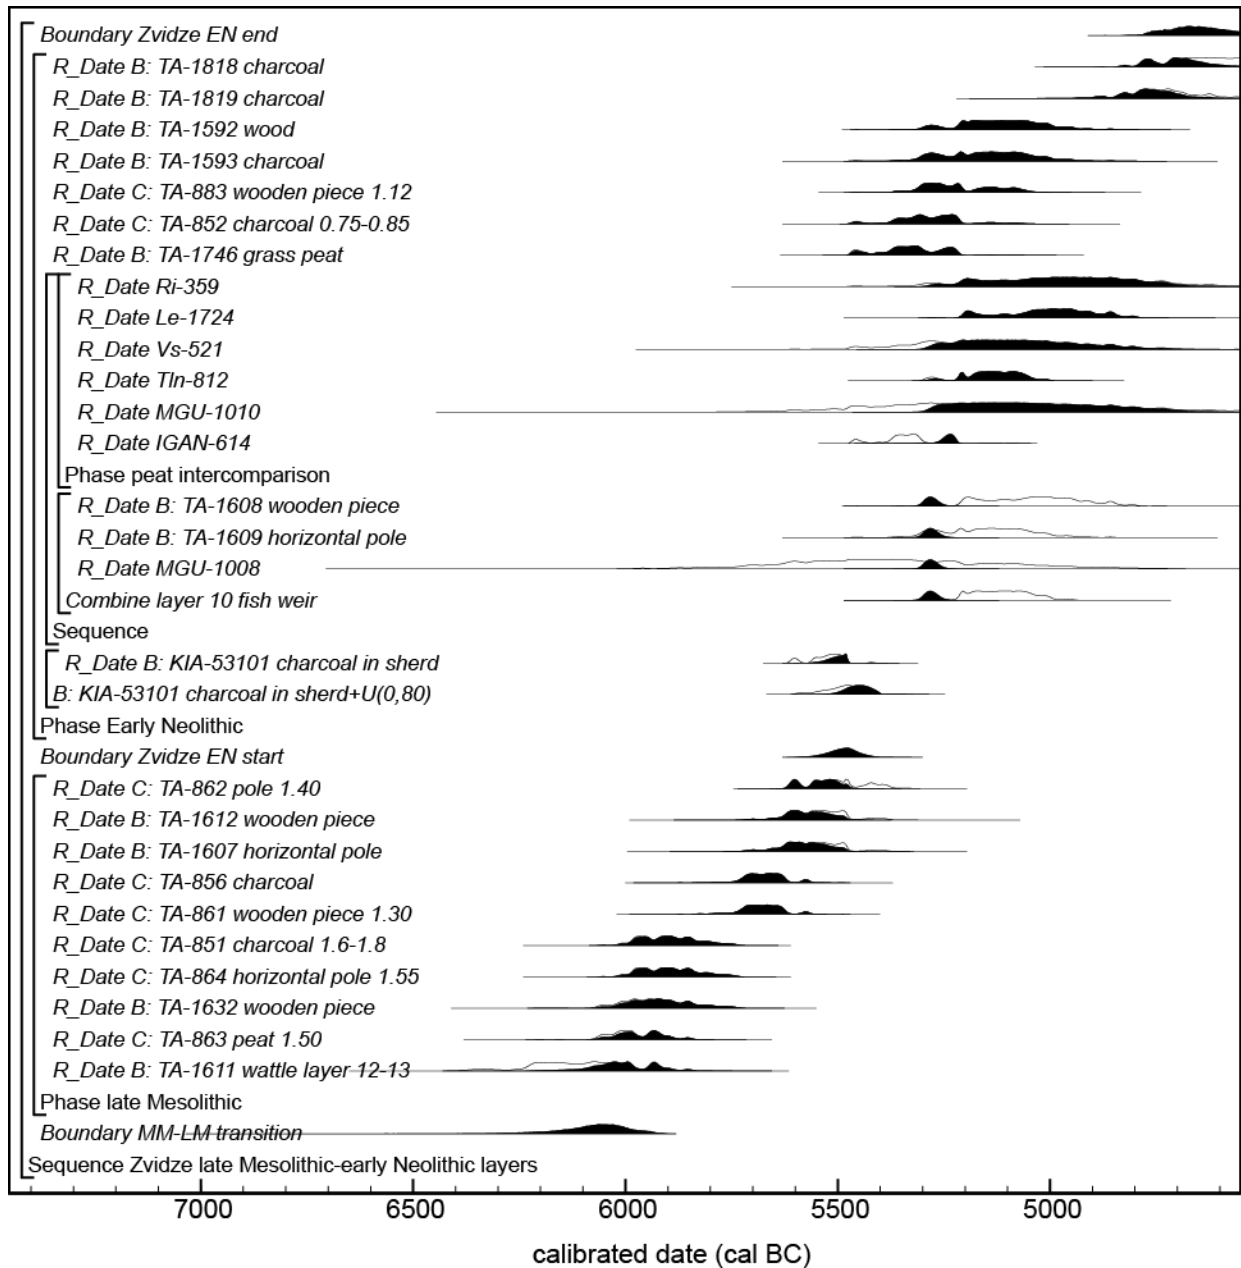

**Supplementary Figure 7:** Chronological model of the early Neolithic occupation of Zvidze, with the same format as Supplementary Figure 1. Duplicate 14C measurements on the same timber structure have been combined after calibration. The date of the charcoal inclusion in pottery, KIA-53101, has been shifted 0-80 years later to account for the intrinsic age of the wood.

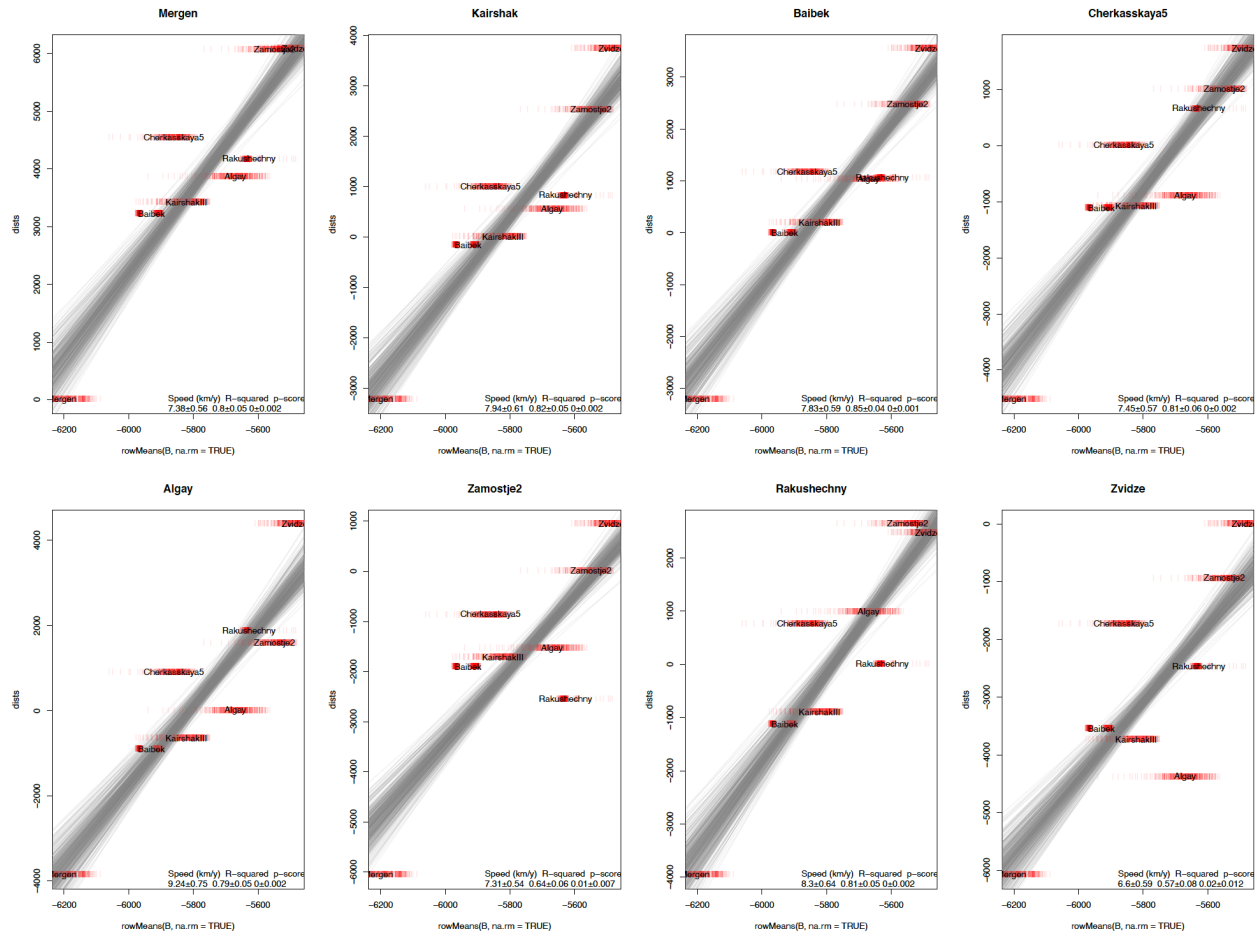

**Supplementary Figure 8:** Ordinary least-squares regression models of the diffusion rate of pottery including all sites

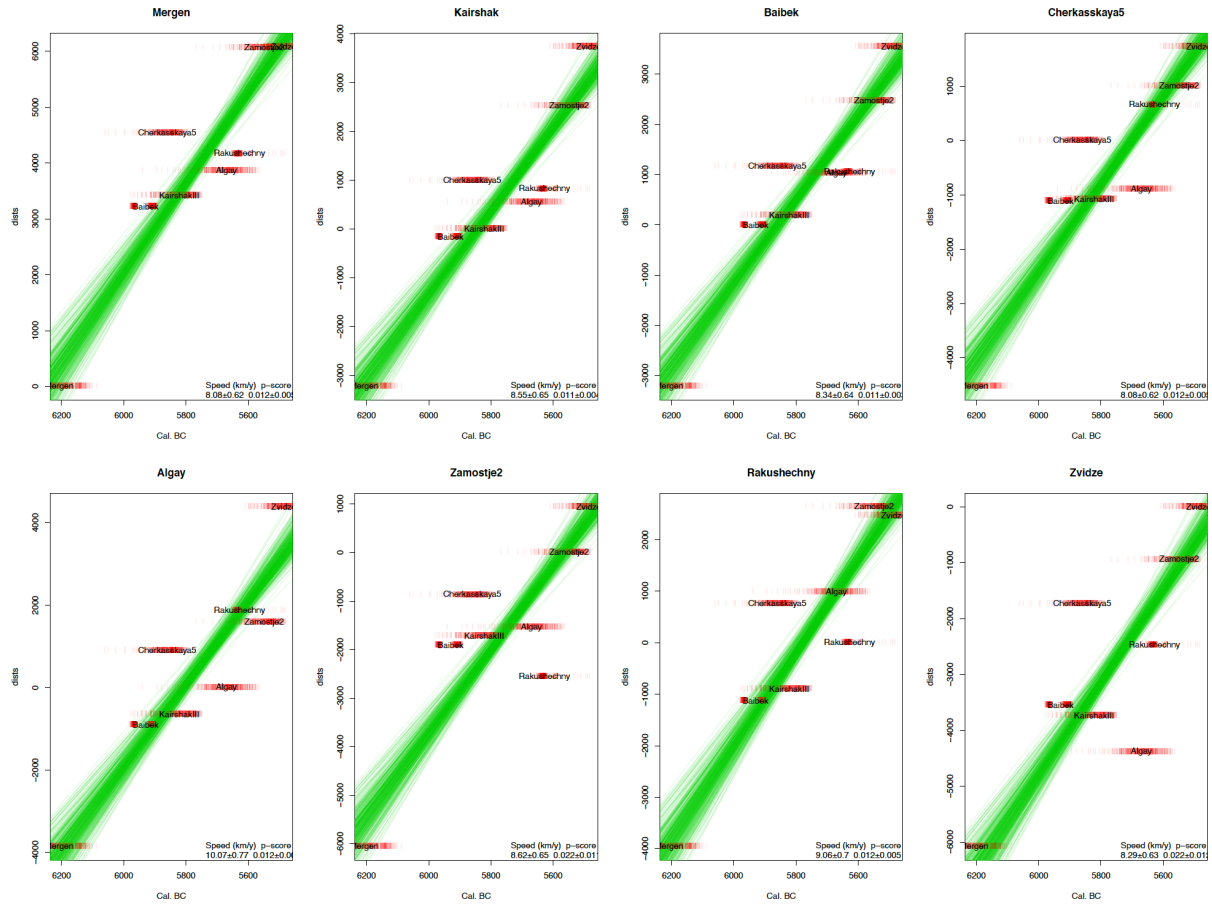

Supplementary Figure 9: Reduced major axis regression models of the diffusion rate of pottery

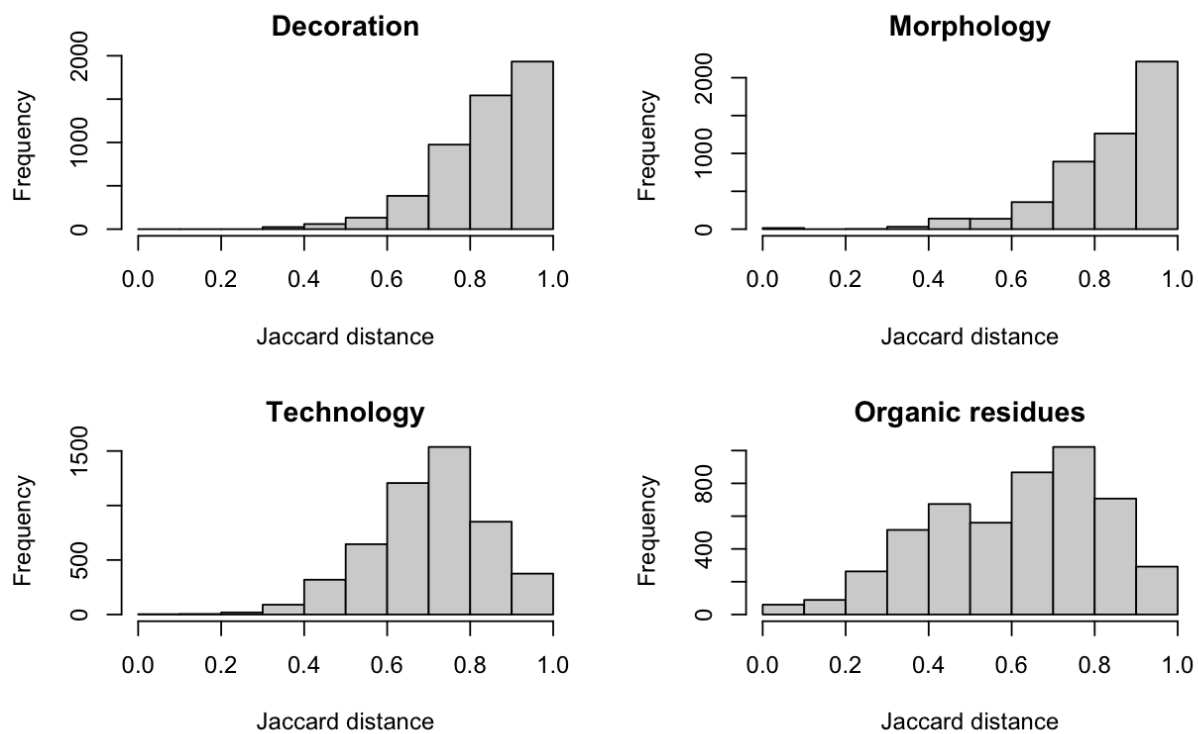

**Supplementary Figure 10:** Histograms illustrating the distribution of Jaccard distances

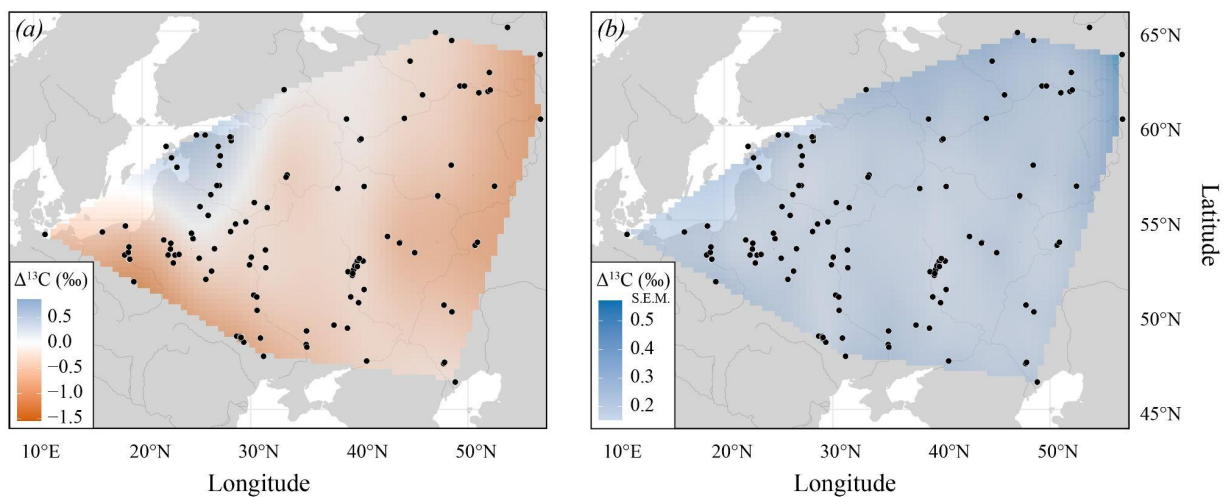

**Supplementary Figure 12:** (a) Output of AverageR model showing spatial estimates of  $\Delta^{13}\text{C}$  (C<sub>18:0</sub>-C<sub>16:0</sub>) values of fatty acids. (b) Standard error of the mean for the estimated  $\Delta^{13}\text{C}$  values shown in panel (a).

# Supplementary Tables

**Supplementary Table 1: Sites in the study**

| Site                      | Region           | Country | Longitude | Latitude |
|---------------------------|------------------|---------|-----------|----------|
| Dubokray V                | Dnepr-Dvina area | Russia  | 30.33     | 55.93    |
| Rudnya Serseyskaya        | Dnepr-Dvina area | Russia  | 31.53     | 55.65    |
| Serteya X                 | Dnepr-Dvina area | Russia  | 31.53     | 55.63    |
| Serteya XIV               | Dnepr-Dvina area | Russia  | 31.51     | 55.67    |
| Borisoglebskaya           | Don region       | Russia  | 42.05     | 51.35    |
| Cherkasskaya              | Don region       | Russia  | 39.93     | 50.64    |
| Cherkasskaya 3            | Don region       | Russia  | 39.93     | 50.64    |
| Cherkasskaya 5            | Don region       | Russia  | 39.93     | 50.64    |
| Dobroe 4                  | Don region       | Russia  | 39.81     | 52.83    |
| Dobroe 7                  | Don region       | Russia  | 39.81     | 52.83    |
| Dobroe 9                  | Don region       | Russia  | 39.81     | 52.83    |
| Dronikha                  | Don region       | Russia  | 40.45     | 51.33    |
| Karamyshevo 19            | Don region       | Russia  | 39.44     | 52.38    |
| Karamyshevo 9             | Don region       | Russia  | 39.47     | 52.38    |
| Kopanische                | Don region       | Russia  | 39.21     | 50.95    |
| Ksizovo                   | Don region       | Russia  | 38.96     | 52.28    |
| Lipetskoe ozero           | Don region       | Russia  | 39.59     | 52.59    |
| Monastyrskaya             | Don region       | Russia  | 40.44     | 51.34    |
| mouth of Izlegoschi River | Don region       | Russia  | 39.36     | 52.09    |
| №380                      | Don region       | Russia  | 39.74     | 52.76    |
| Rybnoe ozero 2, site 202  | Don region       | Russia  | 39.81     | 52.56    |
| Savitskoe                 | Don region       | Russia  | 39.4      | 52.19    |
| Staroe Torbeevo 11        | Don region       | Russia  | 40.35     | 52.84    |

| Site                     | Region                          | Country   | Longitude | Latitude |
|--------------------------|---------------------------------|-----------|-----------|----------|
| Vasilievsky kordon 3     | Don region                      | Russia    | 39.98     | 52.98    |
| Vasilievsky kordon 5     | Don region                      | Russia    | 39.99     | 52.98    |
| Vasilievsky kordon 7     | Don region                      | Russia    | 40        | 52.98    |
| Yarlukovskaya protoka    | Don region                      | Russia    | 39.82     | 52.56    |
| Hyrlo Biloi (Pidhorivka) | Donets region                   | Ukraine   | 38.91     | 49.3     |
| Oleksandriia             | Donets region                   | Ukraine   | 37.67     | 49.46    |
| Akali                    | Eastern shore of the Baltic sea | Estonia   | 27.2      | 58.4     |
| Iča                      | Eastern shore of the Baltic sea | Latvia    | 27.1      | 56.83    |
| Jara 2                   | Eastern shore of the Baltic sea | Lithuania | 25.32     | 55.72    |
| Kääpa                    | Eastern shore of the Baltic sea | Estonia   | 27.1      | 57.9     |
| Kalmaküla                | Eastern shore of the Baltic sea | Estonia   | 27        | 58.9     |
| Kõnnu                    | Eastern shore of the Baltic sea | Estonia   | 22.7      | 58.3     |
| Kõpu I                   | Eastern shore of the Baltic sea | Estonia   | 22.2      | 58.9     |
| Kretuonas                | Eastern shore of the Baltic sea | Lithuania | 26.08     | 55.25    |
| Kroodi                   | Eastern shore of the Baltic sea | Estonia   | 25        | 59.5     |
| Lommi III                | Eastern shore of the Baltic sea | Estonia   | 28.2      | 59.2     |
| Narva Joaorg             | Eastern shore of the Baltic sea | Estonia   | 28.2      | 59.4     |
| Osa                      | Eastern shore of the Baltic sea | Latvia    | 26.32     | 56.35    |
| Riigiküla IV             | Eastern shore of the Baltic sea | Estonia   | 28.1      | 59.4     |
| Riigiküla VI             | Eastern shore of the Baltic sea | Estonia   | 28.1      | 59.4     |
| Ruhnu II                 | Eastern shore of the Baltic sea | Estonia   | 23.2      | 57.8     |
| Vihasoo III              | Eastern shore of the Baltic sea | Estonia   | 25.8      | 59.5     |
| Zvidze                   | Eastern shore of the Baltic sea | Latvia    | 26.88     | 56.83    |
| Kuromoila                | Karelia                         | Russia    | 33.07     | 61.9     |
| Rakucheshny Yar          | Low Don                         | Russia    | 40.67     | 47.56    |
| Algay                    | Low Volga                       | Russia    | 48.53     | 50.16    |
| Varfolomeevka            | Low Volga                       | Russia    | 47.8      | 50.52    |
| Igren V                  | Lower Dnieper region            | Ukraine   | 35.11     | 48.43    |

| Site                | Region                          | Country   | Longitude | Latitude |
|---------------------|---------------------------------|-----------|-----------|----------|
| Strilcha Skelia     | Lower Dnieper region            | Ukraine   | 35.17     | 48.29    |
| Yosypivka-Lyman     | Lower Dnieper region            | Ukraine   | 35.13     | 49.15    |
| Dudka               | Masurian lake district          | Poland    | 21.986    | 53.956   |
| Szczepanki 8        | Masurian lake district          | Poland    | 21.986    | 53.956   |
| Hryni               | Middle Dnieper region           | Ukraine   | 30.27     | 51.05    |
| Romankiv 3          | Middle Dnieper region           | Ukraine   | 30.58     | 50.24    |
| Strumil             | Middle Dnieper region           | Ukraine   | 30.56     | 50.94    |
| Bolshaya Rakovka 2  | Middle Volga                    | Russia    | 50.65     | 53.67    |
| Chekalino IV        | Middle Volga                    | Russia    | 50.91     | 53.86    |
| Dubovskoe III       | Middle Volga                    | Russia    | 47.2      | 56.27    |
| Dubovskoe VIII      | Middle Volga                    | Russia    | 47.22     | 56.25    |
| Ilyinka             | Middle Volga                    | Russia    | 50.64     | 53.65    |
| Imerka 7            | Middle Volga                    | Russia    | 42.62     | 54.12    |
| Imerka 8            | Middle Volga                    | Russia    | 42.59     | 54.14    |
| Krasny gorodok      | Middle Volga                    | Russia    | 50.64     | 53.65    |
| Lebyzhinka 4        | Middle Volga                    | Russia    | 50.67     | 53.68    |
| Nizhnya Orlyanka II | Middle Volga                    | Russia    | 50.88     | 53.84    |
| Otarskaya 6         | Middle Volga                    | Russia    | 47.22     | 56.3     |
| Ozimenki 2          | Middle Volga                    | Russia    | 43.74     | 53.83    |
| Podlesnoe III       | Middle Volga                    | Russia    | 45.1      | 53.28    |
| Potodeevo           | Middle Volga                    | Russia    | 43.7      | 53.79    |
| Asaviec 4           | Middle Western Dvina River      | Belarus   | 29.55     | 54.91    |
| Biarešča 4          | Middle Western Dvina River      | Belarus   | 28.6      | 54.8     |
| Zacennie            | Middle Western Dvina River      | Belarus   | 28.14     | 54.4     |
| Brańsk, site 22     | Neman river and Volhynia region | Poland    | 22.868    | 52.739   |
| Drazdy 12           | Neman river and Volhynia region | Belarus   | 26.66     | 53.49    |
| Dubičiai 3          | Neman river and Volhynia region | Lithuania | 24.74     | 54.02    |
| Glūkas 3            | Neman river and Volhynia region | Lithuania | 24.57     | 54.29    |

| Site                   | Region                          | Country   | Longitude | Latitude |
|------------------------|---------------------------------|-----------|-----------|----------|
| Grądy-Woniecko, site 1 | Neman river and Volhynia region | Poland    | 22.385    | 53.162   |
| Gribaša 4              | Neman river and Volhynia region | Lithuania | 24.7      | 54.04    |
| Jeroniki, site 2       | Neman river and Volhynia region | Poland    | 23.023    | 53.154   |
| Kamień 6               | Neman river and Volhynia region | Belarus   | 26.39     | 52.31    |
| Karaviškės 6           | Neman river and Volhynia region | Lithuania | 24.68     | 54.03    |
| Krzemienne, site 2     | Neman river and Volhynia region | Poland    | 23.398    | 53.194   |
| Rusakova               | Neman river and Volhynia region | Belarus   | 25.25     | 52.99    |
| Senchytsi 3            | Neman river and Volhynia region | Ukraine   | 25.86     | 51.87    |
| Sośnia, site 1         | Neman river and Volhynia region | Poland    | 22.601    | 53.476   |
| Stacze, site 1         | Neman river and Volhynia region | Poland    | 22.633    | 53.784   |
| Varėnė 10              | Neman river and Volhynia region | Lithuania | 24.53     | 54.31    |
| Baibek                 | Northern Caspian                | Russia    | 48.84     | 46.45    |
| Kairshak III           | Northern Caspian                | Russia    | 47.76     | 47.42    |
| Kugat IV               | Northern Caspian                | Russia    | 47.85     | 47.49    |
| Chernaya Vadia         | Northern part of Eastern Europe | Russia    | 49.27     | 62.09    |
| Chernoborskaya III     | Northern part of Eastern Europe | Russia    | 53.65     | 65.19    |
| Chudgudorjag           | Northern part of Eastern Europe | Russia    | 51.04     | 61.75    |
| Dutovo I               | Northern part of Eastern Europe | Russia    | 56.65     | 63.75    |
| En'ty IA               | Northern part of Eastern Europe | Russia    | 51.01     | 61.73    |
| Khomutovskoe boloto 2  | Northern part of Eastern Europe | Russia    | 56.69     | 60.35    |
| Kochmas                | Northern part of Eastern Europe | Russia    | 49.68     | 62.09    |
| Koneschelic            | Northern part of Eastern Europe | Russia    | 47.02     | 64.92    |
| Pezmog IV              | Northern part of Eastern Europe | Russia    | 51.85     | 61.8     |
| Prilukskaya            | Northern part of Eastern Europe | Russia    | 45.82     | 61.62    |
| Ugdym IA               | Northern part of Eastern Europe | Russia    | 52.05     | 61.88    |
| Ursinka 1              | Northern part of Eastern Europe | Russia    | 56.69     | 60.34    |
| Vis I                  | Northern part of Eastern Europe | Russia    | 51.98     | 62.81    |
| Vis II                 | Northern part of Eastern Europe | Russia    | 51.98     | 62.81    |



| Site                       | Region                           | Country | Longitude | Latitude |
|----------------------------|----------------------------------|---------|-----------|----------|
| Yavron'ga 1                | Northern part of Eastern Europe  | Russia  | 44.68     | 63.41    |
| Zubovo                     | Northern part of Eastern Europe  | Russia  | 48.5      | 64.5     |
| Kochurovskoe I             | Perm                             | Russia  | 52.45     | 56.8     |
| Koshkinskaya               | Perm                             | Russia  | 48.46     | 57.91    |
| Bazkiv Ostriv              | Southern Bug region              | Ukraine | 29.36     | 48.55    |
| Dobrianka 1                | Southern Bug region              | Ukraine | 30.89     | 48.77    |
| Dobrianka 3                | Southern Bug region              | Ukraine | 30.89     | 48.77    |
| Hlynske I                  | Southern Bug region              | Ukraine | 29.09     | 48.74    |
| Pechera I                  | Southern Bug region              | Ukraine | 28.71     | 48.87    |
| Puhach II                  | Southern Bug region              | Ukraine | 31.18     | 47.81    |
| Samchyntsi I               | Southern Bug region              | Ukraine | 29.05     | 48.87    |
| Shchurivtci-Shymanovske II | Southern Bug region              | Ukraine | 29.11     | 48.82    |
| Shchurivtci-Porih          | Southern Bug region              | Ukraine | 29.14     | 48.83    |
| Skybyntsi                  | Southern Bug region              | Ukraine | 29.36     | 48.56    |
| Sokiltsi I                 | Southern Bug region              | Ukraine | 29.11     | 48.8     |
| Sokiltsi II                | Southern Bug region              | Ukraine | 29.11     | 48.8     |
| Sokiltsi VI                | Southern Bug region              | Ukraine | 29.11     | 48.81    |
| Dąbki, site 9              | Southern shore of the Baltic sea | Poland  | 16.33     | 54.38    |
| Grube-Rosenhof LA 58       | Southern shore of the Baltic sea | Germany | 11.05     | 54.25    |
| Dubovy Loh 5               | Upper Dniepr                     | Belarus | 31.38     | 52.49    |
| Lučyn Barok                | Upper Dniepr                     | Belarus | 30.03     | 53       |
| Lučyn Barok Siamionaŭski   | Upper Dniepr                     | Belarus | 30.05     | 53.02    |
| Prorva 2                   | Upper Dniepr                     | Belarus | 30.05     | 53.05    |
| Taŭstyki 1                 | Upper Dniepr                     | Belarus | 29.86     | 52.62    |
| Turja                      | Upper Dniepr                     | Belarus | 31.35     | 53.43    |
| Vasilievičy 3              | Upper Dniepr                     | Belarus | 29.88     | 52.64    |
| Sakhtysh 2                 | Upper Volga                      | Russia  | 40.45     | 56.78    |
| Sakhtysh 2a                | Upper Volga                      | Russia  | 40.45     | 56.78    |

| Site                               | Region         | Country | Longitude | Latitude |
|------------------------------------|----------------|---------|-----------|----------|
| Sakhtysh 8                         | Upper Volga    | Russia  | 40.44     | 56.78    |
| Zamostje 2                         | Upper Volga    | Russia  | 38.01     | 56.68    |
| Kochische II                       | Valday         | Russia  | 33.24     | 57.29    |
| Schepochnik                        | Valday         | Russia  | 33.35     | 57.39    |
| Zalesie                            | Valday         | Russia  | 33.25     | 57.27    |
| Dzikowo, site 26                   | Vistula river  | Poland  | 18.791    | 52.936   |
| Kaldus, site 3                     | Vistula river  | Poland  | 18.382    | 53.161   |
| Lutomiersk-Wrzęca                  | Vistula river  | Poland  | 19.232    | 51.751   |
| Mgoszcz, site 2                    | Vistula river  | Poland  | 18.723    | 53.301   |
| Osiek, site 9                      | Vistula river  | Poland  | 18.815    | 52.942   |
| Rzucewo 1                          | Vistula river  | Poland  | 18.455    | 54.694   |
| Sąsieczo, site 3 (concentration 1) | Vistula river  | Poland  | 18.859    | 52.942   |
| Sąsieczo, site 4                   | Vistula river  | Poland  | 18.86     | 52.941   |
| Sąsieczo, site 4 (concentration 1) | Vistula river  | Poland  | 18.86     | 52.941   |
| Welcz Wielki, site 10A             | Vistula river  | Poland  | 18.781    | 53.591   |
| Welcz Wielki, site 10B             | Vistula river  | Poland  | 18.782    | 53.589   |
| Berezovaya Slobodka                | Vologda region | Russia  | 44.15     | 60.38    |
| Karavaikha 4                       | Vologda region | Russia  | 38.82     | 60.35    |
| Liminskaya                         | Vologda region | Russia  | 40.05     | 59.24    |
| Veksa I                            | Vologda region | Russia  | 40.18     | 59.29    |
| Veksa III                          | Vologda region | Russia  | 40.17     | 59.29    |

**Supplementary Table 2: New and/or previously unpublished <sup>14</sup>C results**

| Site   | Lab. code   | <sup>14</sup> C age BP | <sup>14</sup> C error | δ <sup>13</sup> C ‰ | δ <sup>15</sup> N ‰ | C % | N % | C/N ratio | Sample material                   | Archaeological excavation and contextual details |
|--------|-------------|------------------------|-----------------------|---------------------|---------------------|-----|-----|-----------|-----------------------------------|--------------------------------------------------|
| Algay  | SUERC-88034 | 6638                   | 26                    | -19.2               | 7.6                 |     |     | 3.4       | koulan bone (6.4% collagen yield) | square 18-22; layer 30                           |
| Algay  | SUERC-88039 | 6669                   | 26                    | -19.4               | 8.7                 |     |     | 3.3       | auroch bone (8.6% collagen yield) | square 18-22; layer 30                           |
| Algay  | SUERC-88038 | 6623                   | 26                    | -16.0               | 9.5                 |     |     | 3.3       | saiga bone (13.9% collagen yield) | square 18-22; layer 31                           |
| Algay  | SUERC-88040 | 6380                   | 27                    | -17.6               | 10.3                |     |     | 3.1       | saiga bone (5.1% collagen yield)  | square 23-25 28-30; layer 31                     |
| Algay  | SUERC-88041 | 6239                   | 23                    | -16.2               | 8.5                 |     |     | 3.2       | indet. bone (6% collagen yield)   | square 23-25 28-30; layer 31                     |
| Algay  | SPb-3346    | 6882                   | 100                   |                     |                     |     |     |           | bone                              |                                                  |
| Algay  | SPb-3348    | 6205                   | 120                   |                     |                     |     |     |           | bone                              |                                                  |
| Algay  | SPb-3360    | 6200                   | 70                    |                     |                     |     |     |           | bone                              |                                                  |
| Baibek | DeA-20722   | 6992                   | 37                    |                     |                     |     |     |           | bone                              | 2013 exc. 1 (ashpit 2)                           |
| Baibek | DeA-20723   | 6976                   | 37                    |                     |                     |     |     |           | bone                              | 2013 exc. 1 (ashpit 2)                           |
| Baibek | DeA-20724   | 7097                   | 41                    |                     |                     |     |     |           | bone                              | 2013 exc. 1 (pit 1)                              |
| Baibek | DeA-20725   | 7034                   | 43                    |                     |                     |     |     |           | bone                              | 2013 exc. 1 (pit 1)                              |

| Site   | Lab. code | <sup>14</sup> C age BP | <sup>14</sup> C error | $\delta^{13}\text{C} \text{ ‰}$ | $\delta^{15}\text{N} \text{ ‰}$ | C %  | N % | C/N ratio | Sample material              | Archaeological excavation and contextual details |
|--------|-----------|------------------------|-----------------------|---------------------------------|---------------------------------|------|-----|-----------|------------------------------|--------------------------------------------------|
| Baibek | OxA-39162 | 7010                   | 27                    | -19.5                           | 8.7                             | 45.0 |     | 3.2       | bone (36.26% collagen yield) | 2013 exc.1 sq.8; cultural layer 1                |
| Baibek | DeA-20726 | 7056                   | 38                    |                                 |                                 |      |     |           | bone                         | 2014 E part sq.393; layer 4 (pit 1)              |
| Baibek | DeA-20727 | 7036                   | 37                    |                                 |                                 |      |     |           | bone                         | 2014 E part sq.393; layer 4 (pit 1)              |
| Baibek | DeA-20728 | 6998                   | 39                    |                                 |                                 |      |     |           | bone                         | 2014 exc.1 E part sq.374 (ashpit 3)              |
| Baibek | DeA-20729 | 7023                   | 39                    |                                 |                                 |      |     |           | bone                         | 2014 exc.1 situation 3 sq.135 (pit 4)            |
| Baibek | DeA-20957 | 6952                   | 40                    |                                 |                                 |      |     |           | red deer bone                | 2014 sq.393 397 (ash-pit 6)                      |
| Baibek | DeA-20958 | 7012                   | 34                    |                                 |                                 |      |     |           | koulan bone                  | 2014 sq.393 397 (ash-pit 6)                      |
| Baibek | DeA-20730 | 7023                   | 39                    |                                 |                                 |      |     |           | koulan bone                  | 2017 (pit 1)                                     |
| Baibek | OxA-39163 | 7060                   | 28                    | -19.4                           | 10.5                            | 44.1 |     | 3.2       | bone (19.39% collagen yield) | 2017 exc.1 (pit 1 dwelling 1)                    |
| Baibek | OxA-39164 | 7030                   | 28                    | -20.1                           | 8.8                             | 44.1 |     | 3.2       | bone (8.5% collagen yield)   | 2017 exc.1 E-W section sq. 443; low level        |
| Baibek | OxA-39165 | 7012                   | 28                    | -19.1                           | 9.3                             | 44.2 |     | 3.2       | bone (12.62% collagen yield) | 2017 exc.1 E-W section sq. 443; low level        |
| Baibek | OxA-39166 | 7035                   | 27                    | -19.7                           | 8.5                             | 44.0 |     | 3.2       | bone (18.84% collagen yield) | 2017 exc.1 N part N-S section sq. 437; low level |
| Baibek | OxA-39296 | 7030                   | 27                    | -19.4                           | 9.3                             |      |     | 3.2       | bone (7.3% collagen yield)   | 2017 exc.1 N part sq. 422; level 14 (dwelling)   |
| Baibek | OxA-39074 | 7048                   | 25                    | -19.5                           | 7.5                             | 45.9 |     | 3.2       | bone                         | 2017 exc.1 N part sq. 427; level8 (dwelling)     |

| Site   | Lab. code | <sup>14</sup> C age BP | <sup>14</sup> C error | $\delta^{13}\text{C} \text{ ‰}$ | $\delta^{15}\text{N} \text{ ‰}$ | C %  | N % | C/N ratio | Sample material                     | Archaeological excavation and contextual details                             |
|--------|-----------|------------------------|-----------------------|---------------------------------|---------------------------------|------|-----|-----------|-------------------------------------|------------------------------------------------------------------------------|
| Baibek | OxA-39332 | 6989                   | 32                    | -19.6                           | 7.7                             |      |     | 3.4       | bone (<1% collagen yield)           | 2017 exc.1 N part sq. 429; level 3                                           |
| Baibek | OxA-39075 | 7023                   | 24                    | -17.2                           | 12.0                            | 46.6 |     | 3.2       | saiga bone                          | 2017 exc.1 sq. 416; layer 6                                                  |
| Baibek | OxA-39076 | 7016                   | 24                    | -19.2                           | 11.4                            | 46.1 |     | 3.2       | koulan bone                         | 2017 excavation 1 northern part sq. 460; level3 (ashpit 7)                   |
| Baibek | OxA-39077 | 7024                   | 25                    | -19.8                           | 8.2                             | 45.6 |     | 3.2       | red deer bone                       | 2017 fire-place; layer 12                                                    |
| Baibek | OxA-39133 | 6994                   | 29                    | -19.2                           | 8.5                             | 40.8 |     | 3.2       | bone (15.55% collagen yield)        | 2017 N part N-S section sq. 437; low level (low bottom part of the dwelling) |
| Baibek | OxA-39232 | 6978                   | 28                    | -17.8                           | 9.8                             | 42.0 |     | 3.2       | koulan bone (17.1% collagen yield)  | 2017 northern part; level 2 (pit 4)                                          |
| Baibek | OxA-39134 | 6994                   | 28                    | -19.3                           | 9.1                             | 43.0 |     | 3.2       | red deer bone (18.3% coll. yield)   | 2017 pit 4; level 2                                                          |
| Baibek | OxA-39518 | 7041                   | 27                    | -19.4                           | 7.3                             | 42.1 |     | 3.2       | red deer bone (4.4% collagen yield) | 2017 sq. 424; layer 6                                                        |
| Baibek | OxA-39136 | 6999                   | 29                    | -19.0                           | 8.5                             | 41.7 |     | 3.2       | saiga bone (15.9% collagen yield)   | 2017 sq. 428 429 435 436; layer 12 (fire-place)                              |
| Baibek | OxA-39137 | 7020                   | 28                    | -18.6                           | 8.9                             | 43.0 |     | 3.2       | koulan bone (47.4% collagen yield)  | 2018 eastern part square 543; level 3                                        |
| Baibek | OxA-39138 | 7002                   | 29                    | -16.3                           | 14.3                            | 42.8 |     | 3.2       | saiga bone (15.85% collagen yield)  | 2018 eastern part square 543; level 3                                        |

| Site            | Lab. code    | <sup>14</sup> C age BP | <sup>14</sup> C error | $\delta^{13}\text{C}$ ‰ | $\delta^{15}\text{N}$ ‰ | C %  | N %  | C/N ratio | Sample material                      | Archaeological excavation and contextual details |
|-----------------|--------------|------------------------|-----------------------|-------------------------|-------------------------|------|------|-----------|--------------------------------------|--------------------------------------------------|
| Baibek          | OxA-39139    | 7022                   | 29                    | -18.7                   | 10.5                    | 42.4 |      | 3.2       | red deer bone (10.4% collagen yield) | 2018 eastern part square 543; level 3            |
| Baibek          | DeA-20731    | 7037                   | 37                    |                         |                         |      |      |           | koulan bone                          | 2018; layer 12 (fire-place)                      |
| Baibek          | DeA-20732    | 7026                   | 76                    |                         |                         |      |      |           | koulan bone                          | 2018; level 2 (ash-pit 13)                       |
| Kairshak III    | OxA-40228    | 6908                   | 26                    | -20.3                   | 6.6                     | 45.0 |      | 3.2       | koulan bone (6.6% collagen yield)    | sample 1                                         |
| Kairshak III    | SUERC-93642  | 6973                   | 44                    | -19.1                   | 10.2                    |      |      | 3.2       | koulan bone (9.1% collagen yield)    | sample 2                                         |
| Kairshak III    | OxA-40229    | 6890                   | 27                    | -19.8                   | 7.2                     | 42.6 |      | 3.2       | koulan bone (1.1% collagen yield)    | sample 3                                         |
| Kairshak III    | SUERC-100998 | 6934                   | 27                    | -20.4                   | 8.1                     | 33.1 | 11.6 | 3.3       | bone (6.9% collagen yield)           | sq.104 pit; level 5 (shovel depth)               |
| Kairshak III    | SUERC-100999 | 6885                   | 25                    | -19.4                   | 9.8                     | 36.3 | 12.4 | 3.4       | bone (9.6% collagen yield)           | sq.105; level 4 (shovel depth)                   |
| Kairshak III    | SUERC-101001 | 6872                   | 25                    | -19.0                   | 10.9                    | 33.8 | 12.3 | 3.2       | bone (6% collagen yield)             | sq.32; lower level                               |
| Kairshak III    | SUERC-101000 | 6901                   | 27                    | -20.2                   | 8.0                     | 36.3 | 12.7 | 3.3       | bone (7.6% collagen yield)           | sq.99 pit; level 5 (shovel depth)                |
| Rakushechny Yar | SUERC-100994 | 6450                   | 26                    | -20.6                   | 6.5                     | 41.2 | 14.1 | 3.4       | bone (6.4% collagen yield)           | Belanovskaya exc. 2; layer 11                    |

| Site            | Lab. code   | <sup>14</sup> C age BP | <sup>14</sup> C error | δ <sup>13</sup> C ‰ | δ <sup>15</sup> N ‰ | C %  | N % | C/N ratio | Sample material                      | Archaeological excavation and contextual details                                    |
|-----------------|-------------|------------------------|-----------------------|---------------------|---------------------|------|-----|-----------|--------------------------------------|-------------------------------------------------------------------------------------|
| Rakushechny Yar | SUERC-86130 | 6658                   | 28                    | -19.9               | 6.6                 |      |     | 3.2       | deer bone (9.5% collagen yield)      | excavation 1; gray clay with charcoals under Unio 12                                |
| Rakushechny Yar | OxA-39431   | 6681                   | 24                    | -20.5               | 7.3                 | 44.2 |     | 3.2       | roe deer bone (5.9% collagen yield)  | excavation 1; gray layer (fewer shells more large fish and pottery)                 |
| Rakushechny Yar | SUERC-86131 | 6684                   | 28                    | -20.2               | 7.6                 |      |     | 3.2       | roe deer bone (10.2% collagen yield) | excavation 1; gray layer (fewer shells more large fish and pottery)                 |
| Rakushechny Yar | OxA-39359   | 6671                   | 27                    | -18.6               | 6.6                 |      |     | 3.2       | cow bone                             | excavation 1; light gray sand with shells (probably layer 18 earlier than layer 17) |
| Rakushechny Yar | OxA-39361   | 6695                   | 26                    | -20.3               | 9.4                 |      |     | 3.2       | deer bone (5% collagen yield)        | excavation 1; Unio 10                                                               |
| Rakushechny Yar | SUERC-86129 | 6766                   | 28                    | -20.1               | 9.9                 |      |     | 3.2       | deer bone (12.4% collagen yield)     | excavation 1; Unio 10                                                               |
| Rakushechny Yar | OxA-39362   | 6656                   | 26                    | -20.4               | 7.0                 |      |     | 3.2       | pig bone (3.1% collagen yield)       | excavation 1; vivip layer under clay in water                                       |
| Rakushechny Yar | OxA-39363   | 6651                   | 25                    | -20.8               | 5.3                 |      |     | 3.2       | deer bone (8% collagen yield)        | excavation 1; vivip layer under clay in water                                       |
| Rakushechny Yar | SUERC-86132 | 6638                   | 28                    | -20.4               | 7.7                 |      |     | 3.2       | pig bone (4.5% collagen yield)       | excavation 1; vivip layer under clay in water                                       |
| Rakushechny Yar | SUERC-86136 | 6677                   | 28                    | -20.3               | 5.9                 |      |     | 3.1       | deer bone (11.2% collagen yield)     | excavation 1; vivip layer under clay in water                                       |

| Site            | Lab. code   | <sup>14</sup> C age BP | <sup>14</sup> C error | $\delta^{13}\text{C}$ ‰ | $\delta^{15}\text{N}$ ‰ | C %  | N %  | C/N ratio | Sample material                           | Archaeological excavation and contextual details   |
|-----------------|-------------|------------------------|-----------------------|-------------------------|-------------------------|------|------|-----------|-------------------------------------------|----------------------------------------------------|
| Rakushechny Yar | OxA-39360   | 6661                   | 26                    | -20.5                   | 8.9                     |      |      | 3.2       | pig bone (2.5% collagen yield)            | excavation 4; Unio 2                               |
| Rakushechny Yar | SUERC-86128 | 6676                   | 28                    | -20.5                   | 9.1                     |      |      | 3.3       | pig bone (2.6% collagen yield)            | excavation 4; Unio 2                               |
| Rakushechny Yar | OxA-39430   | 6680                   | 24                    | -20.1                   | 6.3                     | 43.6 |      | 3.2       | deer bone (6% collagen yield)             | excavation; gray clay with charcoals under Unio 12 |
| Rakushechny Yar | KIA-52980   | 6746                   | 27                    |                         |                         |      |      |           | pig bone (0.096 collagen yield)           | ND16; layer 15a (upper part square A7)             |
| Rakushechny Yar | KIA-52990   | 6565                   | 28                    |                         |                         |      |      |           | indet. bone (0.031 collagen yield)        | ND16; layer 17 (lower part)                        |
| Rakushechny Yar | KIA-52991   | 6708                   | 28                    | -19.8                   | 5.2                     | 39.8 | 15.0 | 3.1       | sheep bone (0.027 collagen yield)         | ND16; layer 17 (Unio 6)                            |
| Rakushechny Yar | KIA-52996   | 6596                   | 29                    | -20.0                   | 6.0                     | 40.8 | 15.2 | 3.1       | medium mammal bone (0.136 collagen yield) | ND16; layer 17 (Unio shell #2)                     |
| Rakushechny Yar | KIA-52997   | 6579                   | 30                    | -21.0                   | 5.9                     | 41.6 | 15.3 | 3.2       | large mammal bone (0.044 collagen yield)  | ND16; layer 17 (Unio shell #2)                     |
| Rakushechny Yar | KIA-52978   | 6702                   | 28                    |                         |                         |      |      |           | large mammal bone (0.065 collagen yield)  | ND16; pit (lowest Unio layer)                      |
| Rakushechny Yar | OxA-39364   | 6630                   | 26                    | -21.2                   | 6.7                     |      |      | 3.2       | roe deer bone (2.3% collagen yield)       | trench layer 5a vivip                              |
| Rakushechny Yar | SUERC-86137 | 6355                   | 28                    | -21.1                   | 5.5                     |      |      | 3.2       | horse bone (2.4% collagen yield)          | trench layer 5a vivip                              |



| Site            | Lab. code   | <sup>14</sup> C age BP | <sup>14</sup> C error | δ <sup>13</sup> C ‰ | δ <sup>15</sup> N ‰ | C % | N % | C/N ratio | Sample material                   | Archaeological excavation and contextual details |
|-----------------|-------------|------------------------|-----------------------|---------------------|---------------------|-----|-----|-----------|-----------------------------------|--------------------------------------------------|
| Rakushechny Yar | SUERC-86138 | 6579                   | 28                    | -21.0               | 6.6                 |     |     | 3.2       | roe deer bone (3% collagen yield) | trench layer 5a vivip                            |
| Rakushechny Yar | OxA-39274   | 6652                   | 23                    | -24.2               |                     |     |     |           | wood                              | vivip layer under clay in water                  |
| Rakushechny Yar | SUERC-86127 | 6649                   | 28                    | -25.1               |                     |     |     |           | wood                              | vivip layer under clay in water                  |
| Zamostje 2      | KIA-51172   | 6566                   | 36                    |                     |                     |     |     |           | <i>Viburnum</i> berry             | potsherd J001                                    |
| Zamostje 2      | KIA-51173   | 6527                   | 32                    |                     |                     |     |     |           | <i>Viburnum</i> berry             | potsherd J002                                    |

**Supplementary Table 3: previously-published <sup>14</sup>C ages used in chronological models**

| Site           | Laboratory code | <sup>14</sup> C age BP | <sup>14</sup> C error | δ <sup>13</sup> C ‰ | δ <sup>15</sup> N ‰ | Material      | Ref. |
|----------------|-----------------|------------------------|-----------------------|---------------------|---------------------|---------------|------|
| Algay          | AAR-21892       | 6318                   | 33                    |                     |                     | bone          | 18   |
| Algay          | AAR-21893       | 6605                   | 32                    |                     |                     | charcoal      | 18   |
| Algay          | Poz-76004       | 6490                   | 40                    |                     |                     | charcoal      | 18   |
| Algay          | SPb-1411        | 6360                   | 250                   |                     |                     | charcoal      | 18   |
| Algay          | SPb-1477        | 6479                   | 70                    |                     |                     | bone          | 18   |
| Algay          | SPb-1478        | 6577                   | 80                    |                     |                     | bone          | 18   |
| Algay          | SPb-1509        | 6654                   | 80                    |                     |                     | bone          | 18   |
| Algay          | SPb-1510        | 6820                   | 80                    |                     |                     | bone          | 18   |
| Algay          | SPb-2038        | 6284                   | 100                   |                     |                     | bone          | 18   |
| Algay          | UCIAMS-229409   | 6440                   | 25                    |                     |                     | bone          | 19   |
| Baibek         | SPb-1444        | 6868                   | 80                    |                     |                     | burnt deposit | 20   |
| Baibek         | SPb-1708        | 6868                   | 70                    |                     |                     | bone          | 20   |
| Baibek         | SPb-1709        | 6955                   | 80                    |                     |                     | bone          | 20   |
| Baibek         | SPb-1711        | 7099                   | 100                   |                     |                     | bone          | 20   |
| Baibek         | SPb-1712        | 6827                   | 100                   |                     |                     | charcoal      | 20   |
| Baibek         | SPb-1713        | 6948                   | 120                   |                     |                     | charcoal      | 20   |
| Baibek         | SPb-1715        | 7041                   | 120                   |                     |                     | charcoal      | 20   |
| Baibek         | SPb-1721        | 6952                   | 80                    |                     |                     | bone          | 20   |
| Baibek         | SPb-1722        | 6849                   | 100                   |                     |                     | sediment      | 20   |
| Baibek         | SPb-2785        | 6935                   | 75                    |                     |                     | bone          | 5    |
| Baibek         | SPb-2786        | 6925                   | 70                    |                     |                     | bone          | 5    |
| Baibek         | SPb-2787        | 6950                   | 70                    |                     |                     | bone          | 5    |
| Baibek         | SPb-2789        | 6936                   | 80                    |                     |                     | bone          | 5    |
| Baibek         | SPb-973         | 6955                   | 80                    |                     |                     | bone          | 20   |
| Baibek         | Ua-50260        | 6986                   | 44                    |                     |                     | charcoal      | 20   |
| Cherkasskaya 5 | OxA-39520       | 6999                   | 27                    | -21.0               | 3.2                 | bone          | 10   |

| Site            | Laboratory code | <sup>14</sup> C age BP | <sup>14</sup> C error | δ <sup>13</sup> C ‰ | δ <sup>15</sup> N ‰ | Material          | Ref. |
|-----------------|-----------------|------------------------|-----------------------|---------------------|---------------------|-------------------|------|
| Cherkasskaya 5  | OxA-39521       | 7130                   | 26                    | -20.7               | 3.1                 | tooth             | 10   |
| Cherkasskaya 5  | OxA-39522       | 6982                   | 26                    | -20.9               | 3.6                 | bone              | 10   |
| Cherkasskaya 5  | SUERC-86147     | 6987                   | 28                    | -29.9               |                     | plant macrofossil | 10   |
| Cherkasskaya 5  | SUERC-86148     | 6966                   | 28                    | -20.8               | 3.0                 | bone              | 10   |
| Cherkasskaya 5  | SUERC-86149     | 6943                   | 28                    | -21.0               | 2.9                 | bone              | 10   |
| Cherkasskaya 5  | SUERC-86150     | 6950                   | 28                    | -20.8               | 5.8                 | bone              | 10   |
| Cherkasskaya 5  | SUERC-86151     | 7140                   | 28                    | -20.8               | 3.3                 | tooth             | 10   |
| Cherkasskaya 5  | SUERC-86156     | 6938                   | 28                    | -20.9               | 3.3                 | bone              | 10   |
| Cherkasskaya 5  | SUERC-86157     | 6908                   | 28                    | -21.1               | 2.3                 | tooth             | 10   |
| Cherkasskaya 5  | SUERC-86158     | 6886                   | 28                    | -22.0               | 6.4                 | bone              | 10   |
| Kairshak III    | Hela-4165       | 6996                   | 36                    |                     |                     | bone              | 20   |
| Kairshak III    | Ki-14633        | 7190                   | 80                    |                     |                     | bone              | 20   |
| Kairshak III    | Ki-14634        | 7010                   | 80                    |                     |                     | bone              | 20   |
| Kairshak III    | SPb-316         | 7030                   | 100                   |                     |                     | bone              | 20   |
| Rakushechny Yar | DeA-20969       | 6634                   | 34                    | -20.1               | 5.9                 | bone              | 11   |
| Rakushechny Yar | DeA-20970       | 6568                   | 33                    | -20.4               | 4.6                 | bone              | 11   |
| Rakushechny Yar | DeA-20971       | 6584                   | 33                    | -20.3               | 4.5                 | bone              | 11   |
| Rakushechny Yar | DeA-20972       | 6462                   | 33                    | -19.9               | 4.8                 | bone              | 11   |
| Rakushechny Yar | DeA-21601       | 4535                   | 35                    |                     |                     | bone              | 11   |
| Rakushechny Yar | KIA-52981       | 6590                   | 28                    |                     |                     | bone              | 21   |
| Rakushechny Yar | KIA-52982       | 6649                   | 27                    | -19.8               | 5.9                 | bone              | 21   |
| Rakushechny Yar | KIA-52983       | 6626                   | 28                    | -20.2               | 5.1                 | bone              | 21   |
| Rakushechny Yar | KIA-52984       | 6655                   | 28                    | -20.0               | 5.1                 | bone              | 21   |
| Rakushechny Yar | KIA-52985       | 6632                   | 28                    | -19.2               | 6.5                 | bone              | 21   |
| Rakushechny Yar | KIA-52986       | 6683                   | 29                    | -19.9               | 6.2                 | bone              | 21   |
| Rakushechny Yar | KIA-52987       | 6681                   | 28                    | -20.7               | 7.9                 | bone              | 21   |
| Rakushechny Yar | KIA-52988       | 6645                   | 27                    | -19.6               | 6.0                 | bone              | 21   |
| Rakushechny Yar | KIA-52989       | 6711                   | 27                    | -19.9               | 5.4                 | bone              | 21   |
| Rakushechny Yar | KIA-52992       | 6652                   | 28                    | -19.6               | 5.4                 | bone              | 21   |
| Rakushechny Yar | KIA-52993       | 6650                   | 29                    | -19.5               | 5.4                 | bone              | 21   |

| Site            | Laboratory code | <sup>14</sup> C age BP | <sup>14</sup> C error | δ <sup>13</sup> C ‰ | δ <sup>15</sup> N ‰ | Material          | Ref. |
|-----------------|-----------------|------------------------|-----------------------|---------------------|---------------------|-------------------|------|
| Rakushechny Yar | KIA-52994       | 6643                   | 28                    | -20.1               | 5.5                 | bone              | 21   |
| Rakushechny Yar | KIA-52995       | 6666                   | 30                    | -20.5               | 7.3                 | bone              | 21   |
| Rakushechny Yar | OxA-39619       | 6604                   | 26                    | -19.9               | 6.7                 | bone              | 11   |
| Rakushechny Yar | SUERC-86126     | 4179                   | 28                    | -18.5               | 11.5                | bone              | 11   |
| Rakushechny Yar | SUERC-88042     | 2128                   | 25                    | -20.3               | 9.9                 | bone              | 11   |
| Rakushechny Yar | SUERC-88043     | 6644                   | 27                    | -19.7               | 5.0                 | bone              | 11   |
| Rakushechny Yar | SUERC-94517     | 1855                   | 31                    | -19.6               | 7.4                 | tooth             | 11   |
| Rakushechny Yar | SUERC-94518     | 5433                   | 31                    | -18.9               | 9.1                 | bone              | 11   |
| Zamostje 2      | Beta-283033     | 6550                   | 40                    |                     |                     | wood (worked)     | 22   |
| Zamostje 2      | CNA-1081        | 6452                   | 43                    |                     |                     | wood (worked)     | 22   |
| Zamostje 2      | CNA-1341        | 6539                   | 43                    |                     |                     | wood (worked)     | 22   |
| Zamostje 2      | CNA-1342        | 6676                   | 47                    |                     |                     | wood (worked)     | 22   |
| Zamostje 2      | CNA-1345        | 6646                   | 39                    |                     |                     | wood (worked)     | 22   |
| Zamostje 2      | KIA-50907       | 6545                   | 48                    |                     |                     | plant macrofossil | 13   |
| Zamostje 2      | Le-9523         | 6730                   | 150                   |                     |                     | wood (worked)     | 22   |
| Zamostje 2      | Le-9536         | 6670                   | 80                    |                     |                     | wood (worked)     | 22   |
| Zamostje 2      | SPb-1407        | 6450                   | 90                    |                     |                     | wood from gyttja  | 22   |
| Zamostje 2      | SPb-1542        | 6539                   | 70                    |                     |                     | wood from gyttja  | 22   |
| Zvidze          | IGAN-614        | 6360                   | 40                    |                     |                     | peat              | 17   |
| Zvidze          | KIA-53101       | 6567                   | 33                    | -26.8               |                     | charcoal          | 14   |
| Zvidze          | Le-1724         | 6080                   | 70                    |                     |                     | peat              | 17   |
| Zvidze          | MGU-1008        | 6450                   | 250                   |                     |                     | wood              | 17   |
| Zvidze          | MGU-1010        | 6200                   | 240                   |                     |                     | peat              | 17   |
| Zvidze          | Ri-359          | 6050                   | 150                   |                     |                     | peat              | 17   |
| Zvidze          | TA-1592         | 6170                   | 70                    |                     |                     | wood              | 17   |
| Zvidze          | TA-1593         | 6210                   | 80                    |                     |                     | charcoal          | 17   |
| Zvidze          | TA-1607         | 6630                   | 80                    |                     |                     | wood              | 17   |
| Zvidze          | TA-1608         | 6110                   | 80                    |                     |                     | wood              | 17   |
| Zvidze          | TA-1609         | 6210                   | 80                    |                     |                     | wood              | 17   |
| Zvidze          | TA-1611         | 7240                   | 100                   |                     |                     | wood              | 17   |

| Site   | Laboratory code | <sup>14</sup> C age BP | <sup>14</sup> C error | δ <sup>13</sup> C ‰ | δ <sup>15</sup> N ‰ | Material | Ref. |
|--------|-----------------|------------------------|-----------------------|---------------------|---------------------|----------|------|
| Zvidze | TA-1612         | 6610                   | 80                    |                     |                     | wood     | 17   |
| Zvidze | TA-1632         | 7060                   | 80                    |                     |                     | wood     | 17   |
| Zvidze | TA-1746         | 6350                   | 60                    |                     |                     | peat     | 17   |
| Zvidze | TA-1818         | 5770                   | 60                    |                     |                     | charcoal | 17   |
| Zvidze | TA-1819         | 5870                   | 60                    |                     |                     | charcoal | 17   |
| Zvidze | TA-851          | 7020                   | 60                    |                     |                     | charcoal | 17   |
| Zvidze | TA-852          | 6315                   | 60                    |                     |                     | charcoal | 17   |
| Zvidze | TA-856          | 6770                   | 60                    |                     |                     | charcoal | 17   |
| Zvidze | TA-861          | 6780                   | 60                    |                     |                     | wood     | 17   |
| Zvidze | TA-862          | 6535                   | 60                    |                     |                     | wood     | 17   |
| Zvidze | TA-863          | 7110                   | 60                    |                     |                     | peat     | 17   |
| Zvidze | TA-864          | 7020                   | 60                    |                     |                     | wood     | 17   |
| Zvidze | TA-883          | 6260                   | 60                    |                     |                     | wood     | 17   |
| Zvidze | Tln-812         | 6195                   | 40                    |                     |                     | peat     | 17   |
| Zvidze | Vs-521          | 6180                   | 150                   |                     |                     | peat     | 17   |

**Supplementary Table 4: Estimated average rates of transmission**

| Site            | OLS                          |           |             | RMA                          |             |
|-----------------|------------------------------|-----------|-------------|------------------------------|-------------|
|                 | Speed (km yr <sup>-1</sup> ) | R-squared | p-score     | Speed (km yr <sup>-1</sup> ) | p-score     |
| Mergen          | 7.38±0.56                    | 0.8±0.05  | 0.004±0.002 | 8.08±0.62                    | 0.012±0.005 |
| Kairshak        | 7.94±0.61                    | 0.82±0.05 | 0.004±0.002 | 8.55±0.65                    | 0.011±0.004 |
| Baibek          | 7.83±0.59                    | 0.85±0.04 | 0.002±0.001 | 8.34±0.64                    | 0.011±0.003 |
| Cherhasskaya 5  | 7.45±0.57                    | 0.81±0.06 | 0.004±0.002 | 8.08±0.62                    | 0.012±0.005 |
| Algay           | 9.24±0.75                    | 0.79±0.05 | 0.004±0.002 | 10.07±0.77                   | 0.012±0.004 |
| Zamostje        | 7.31±0.54                    | 0.64±0.06 | 0.01±0.007  | 8.62±0.65                    | 0.022±0.011 |
| Rakushechny Yar | 8.3±0.64                     | 0.81±0.05 | 0.004±0.002 | 9.06±0.7                     | 0.012±0.005 |
| Zvidze          | 6.6±0.59                     | 0.57±0.08 | 0.02±0.012  | 8.29±0.63                    | 0.022±0.012 |

**Supplementary Table 5: Modelled front speeds in archaeological case studies**

| Case study                                    | Front speed (km yr <sup>-1</sup> )             | Reference  |
|-----------------------------------------------|------------------------------------------------|------------|
| Spread of pottery from Asia                   | 1.25 (corridors)<br>0.25 (elsewhere)           | 3          |
| Spread of pottery from Africa                 | 3.23 (corridors)<br>0.46 (elsewhere)           | 3          |
| Neolithic culture in Europe                   | 0.6 to 1.3                                     | 26         |
| Neolithic LBK expansion                       | 0.8±0.6                                        | 27         |
| Neolithic Western Cardial expansion           | 3.3±3.7 (Mediterranean)<br>1.6±1.2 (temperate) | 27         |
| Neolithic expansion in Western Mediterranean  | > 5                                            | 28         |
| Neolithic painted pottery expansion           | 0 to 1.7                                       | 29         |
| Neolithic LBK expansion                       | 0 to 1.7                                       | 29         |
| Neolithic Funnelbeaker expansion              | 0 to 1.2                                       | 29         |
| Neolithic expansion in Scandinavia            | 0.44 to 0.84                                   | 30         |
| Bantu agriculture in Africa                   | 0.03 to 4.3, depending on<br>biome             | 31         |
| Spread of pastoral economy in southern Africa | 1.4 to 2.8                                     | 32         |
| Spread of HG pottery in Eastern Europe        | 6.6±0.59 to 10.07±0.77                         | This study |

**Supplementary Table 6: Pottery traits**

| Table      | Description       | Code |
|------------|-------------------|------|
| Morphology | Sherds from rim   | R    |
| Morphology | Sherds from belly | Be   |

| <b>Table</b> | <b>Description</b>         | <b>Code</b> |
|--------------|----------------------------|-------------|
| Morphology   | Sherds from belly-rib      | Ber         |
| Morphology   | Sherds from low part       | lp          |
| Morphology   | Sherds from bottom         | B           |
| Morphology   | Sherds from whole vessel   | w           |
| Morphology   | Rim rim-flat               | Rf          |
| Morphology   | Rim pointed                | Rp          |
| Morphology   | Rim pointed-flattened      | Rpf         |
| Morphology   | Rim roundish               | Rr          |
| Morphology   | Rim pointed-oblique inside | Ro          |
| Morphology   | Rim thickened              | Rt          |
| Morphology   | Rim oblique outside        | Roo         |
| Morphology   | Rim inturned(c)            | Ri          |
| Morphology   | Rim outurned               | R0.5        |
| Morphology   | Rim thickened wall         | R0.6        |
| Morphology   | Rim angle                  | A           |
| Morphology   | Diameter 5 cm              | D5          |
| Morphology   | Diameter 10-15 cm          | D10         |
| Morphology   | Diameter 16-19 cm          | D16         |
| Morphology   | Diameter 20-25 cm          | D20         |
| Morphology   | Diameter more 25 cm        | D30         |
| Morphology   | Form Form-C (globe)        | Fc          |
| Morphology   | Form demi-globe-bowl       | Fb          |
| Morphology   | Form ellipse closed        | Fec         |
| Morphology   | Form ellipse open          | Feo         |
| Morphology   | Form lamp (ovoid)          | Fl          |

| <b>Table</b> | <b>Description</b>                  | <b>Code</b> |
|--------------|-------------------------------------|-------------|
| Morphology   | Form ladle                          | Fla         |
| Morphology   | Form S-form(cone+globe)             | Fs          |
| Morphology   | Form S+cones (Ert)                  | Fsc         |
| Morphology   | Form S slightly                     | Fss         |
| Morphology   | Form cut oval+globe (Lys Gora type) | FLG         |
| Morphology   | Form critical point                 | cr.p.       |
| Morphology   | Form vertical-cylinder              | Fv          |
| Morphology   | Form neck+ellipse/globe             | Fn          |
| Morphology   | Form closed (cone-ellipse-          | Fc.1        |
| Morphology   | Form biconical                      | Fbi         |
| Morphology   | Form cylinder-cone-angles-low       | X0.9        |
| Morphology   | Volume 0.5 l                        | Vs          |
| Morphology   | Volume 1-2 l                        | Vs1         |
| Morphology   | Volume 3-5 l                        | Vm          |
| Morphology   | Volume 6-10 l                       | Vm1         |
| Morphology   | Volume 11-20 l                      | Vb          |
| Morphology   | flat base                           | X0.10       |
| Morphology   | diameter                            | Bf          |
| Morphology   | flat base - rounded edges           | D           |
| Morphology   | flat with an edge                   | Bfed        |
| Morphology   | Angle                               | Dfe         |
| Morphology   | roundish                            | A.1         |
| Morphology   | r. flattened                        | Br          |
| Morphology   | r.with small lump in extremity      | Brf         |
| Morphology   | conical                             | Brc         |



| <b>Table</b> | <b>Description</b>                    | <b>Code</b> |
|--------------|---------------------------------------|-------------|
| Morphology   | c. thickened                          | Bc          |
| Morphology   | c. flattened                          | Bct         |
| Morphology   | Angle                                 | Bcf         |
| Morphology   | repair holes                          | Urh         |
| Morphology   | fc out                                | Ufco        |
| Morphology   | fc in                                 | Ufci        |
| Morphology   | soot                                  | Uso         |
| Morphology   | splits                                | Ud          |
| Morphology   | abrasion                              | Ue          |
| Technology   | Paste/Temper dense paste              | Td          |
| Technology   | Paste/Temper shell                    | Tsh         |
| Technology   | Paste/Temper sand medium-coarse grain | Ts          |
| Technology   | Paste/Temper thin sandy paste         | Tsandt      |
| Technology   | Paste/Temper hematite                 | Th          |
| Technology   | Paste/Temper crushed stones           | Tcrs        |
| Technology   | Paste/Temper mica                     | Tm          |
| Technology   | Paste/Temper long org remains         | Tlo         |
| Technology   | Paste/Temper org-roundish             | Tor         |
| Technology   | Paste/Temper chamotte                 | Tch         |
| Technology   | Paste/Temper size-big/medium          | cbm         |
| Technology   | Paste/Temper size-small/medium        | csm         |
| Technology   | Abundant                              | a           |
| Technology   | Moderate                              | m           |
| Technology   | Rare                                  | s           |
| Technology   | modelling coils N (up to 1-2 cm)      | McN         |

| <b>Table</b> | <b>Description</b>                     | <b>Code</b> |
|--------------|----------------------------------------|-------------|
| Technology   | modelling N elongated (up to 3 cm)     | McNe        |
| Technology   | modelling N inverse                    | McNi        |
| Technology   | modelling S-slabs                      | Mss         |
| Technology   | modelling N parallel-slabs             | MNs         |
| Technology   | modelling slabs combined - two layers  | MNh         |
| Technology   | modelling slabs- U junction            | Msu         |
| Technology   | modelling U                            | MU          |
| Technology   | modelling H                            | MH          |
| Technology   | modelling beating                      | Mb          |
| Technology   | thickness 0.4-0.6                      | Th5         |
| Technology   | thickness 0.7-0.8                      | Th7         |
| Technology   | thickness 0.9-1.2                      | Th1         |
| Technology   | thickness 1.3-1.8                      | Th2         |
| Technology   | Surface treatment smooth in            | Ssi         |
| Technology   | Surface treatment smooth out           | Sso         |
| Technology   | Surface treatment scratches inner      | Sscri       |
| Technology   | Surface treatment scratches out        | Sscr0       |
| Technology   | Surface treatment polishing out        | Spo         |
| Technology   | Surface treatment polishing in         | Spi         |
| Technology   | Surface treatment single linear traces | Sl          |
| Technology   | Surface treatment smoothed scratches   | Sss         |
| Technology   | Surface treatment brushing in          | Sb          |
| Technology   | Surface treatment ochre                | So          |
| Technology   | Surface treatment polished with ochre  | Spo         |
| Technology   | Surface treatment thin clay layer out  | Scl         |

| <b>Table</b> | <b>Description</b>                                              | <b>Code</b> |
|--------------|-----------------------------------------------------------------|-------------|
| Decoration   | Impressions graphical sign - roundish impressions by bird bone? | Gr          |
| Decoration   | Impressions dots                                                | Gd          |
| Decoration   | Impressions round impr.                                         | Gri         |
| Decoration   | Impressions oval                                                | Go          |
| Decoration   | Impressions triangular                                          | Gt          |
| Decoration   | Impressions stick-edge made-UV                                  | Gse         |
| Decoration   | Impressions denticulated big round                              | Gdb         |
| Decoration   | Impressions denticulated small round                            | Gds         |
| Decoration   | Impressions notches by nail                                     | Gn          |
| Decoration   | Impressions incision hor                                        | Gi          |
| Decoration   | Impressions incision vert                                       | Giv         |
| Decoration   | Impressions denticulated vertical                               | Gde         |
| Decoration   | Impressions quadrangular by stick                               | Gq          |
| Decoration   | Impressions quadrangular twinned                                | Gqt         |
| Decoration   | Impressions scratches group - comb traced                       | Gs          |
| Decoration   | Impressions scratches-all                                       | Gsa         |
| Decoration   | Impressions line                                                | Gl          |
| Decoration   | Impressions short line                                          | Gsl         |
| Decoration   | Impressions two-teeth stamp                                     | Gtt         |
| Decoration   | Impressions short comb forest style                             | Gcs         |
| Decoration   | Impressions short comb 'impresso"                               | Gsc         |
| Decoration   | Impressions oval-comb                                           | Goc         |
| Decoration   | Impressions short comb-retreated                                | Gscr        |
| Decoration   | Impressions long comb                                           | Gcl         |
| Decoration   | Impressions fish bone stamp                                     | Gfb         |

| <b>Table</b> | <b>Description</b>                                 | <b>Code</b> |
|--------------|----------------------------------------------------|-------------|
| Decoration   | Impressions oval left by extremity of a comb stamp | Gol         |
| Decoration   | Impressions false cord impr                        | Gfc         |
| Decoration   | Impressions tuck (Защип)                           | Gt          |
| Decoration   | Motifs +sign_big triang                            | Msbt        |
| Decoration   | Motifs pointed signs along main lines of decor     | Mps         |
| Decoration   | Motifs motive-horizontal rows                      | Mhr         |
| Decoration   | Motifs horiz rows-groups-empty field               | Mhrg        |
| Decoration   | Motifs vertical                                    | Mvr         |
| Decoration   | Motifs oblique parallel                            | Mor         |
| Decoration   | Motifs oblique-put at angle rows                   | Mop         |
| Decoration   | Motifs groups oblique (Middle Don style)           | Mgo         |
| Decoration   | Motifs impr-zigzag horiz                           | Mzh         |
| Decoration   | Motifs impr-zigzag vertical                        | Mzv         |
| Decoration   | Motifs geometrical des                             | Mg          |
| Decoration   | Motifs wavy                                        | Mm          |
| Decoration   | Motifs triangle filled                             | Mtf         |
| Decoration   | Motifs zigzag line                                 | Mzl         |
| Decoration   | Motifs net                                         | Mn          |
| Decoration   | Motifs triangle pendant                            | Mtp         |
| Decoration   | Motifs oval figures filled                         | Mof         |
| Decoration   | Motifs dense meshed net                            | Mdm         |
| Decoration   | Motifs pits+oblique stamp                          | Mpo         |
| Decoration   | Motifs rocking chair                               | Mtrc        |
| Decoration   | Motifs retreating                                  | Mtr         |
| Decoration   | Motifs empty fields                                | Mg          |

| Table      | Description                                               | Code |
|------------|-----------------------------------------------------------|------|
| Decoration | Motifs figure/grouped                                     | Mf   |
| Decoration | Location row under rim                                    | Lr   |
| Decoration | Location rim-outer                                        | Lro  |
| Decoration | Location rim edge                                         | Lre  |
| Decoration | Location rim inside                                       | Lri  |
| Decoration | Location all                                              | La   |
| Decoration | holes under rim                                           | H    |
| Decoration | quadrangle from inside (Lys gora)-pearl outside under rim | Q    |
| Decoration | depressions-pearls inside under rim                       | DP   |
| Decoration | depressions-no pearls                                     | DnP  |
| Decoration | depr-pearls outside                                       | DPo  |
| Decoration | groove under the rim                                      | Gr   |

**Supplementary Table 7: 95% confidence interval for Mantel correlation coefficients and associated *p*-values**

|                              | Circuitscape Resistance | Modelled space-time distance | Great circle distance | Organic Residues | Technology         | Decoration         | Morphology        |
|------------------------------|-------------------------|------------------------------|-----------------------|------------------|--------------------|--------------------|-------------------|
| Circuitscape Resistance      |                         | <b>0.42 – 0.54</b>           | <b>0.17 – 0.29</b>    | -0.09 – -0.01    | -0.06 – 0.03       | -0.02 – 0.04       | -0.02 – 0.03      |
| Modelled space-time distance | <b>0.001</b>            |                              | <b>0.28 – 0.37</b>    | -0.11 – -0.06    | 0.08 – 0.14        | 0.02 – 0.08        | 0.02 – 0.08       |
| Great circle distance        | <b>0.002</b>            | <b>0.001</b>                 |                       | -0.01 – 0.04     | <b>0.22 – 0.28</b> | <b>0.09 – 0.14</b> | <b>0.15 – 0.2</b> |
| Organic Residues             | 0.377                   | 0.1                          | 0.77                  |                  | <b>0.15 – 0.22</b> | <b>0.11 – 0.17</b> | <b>0.1 – 0.16</b> |
| Technology                   | 0.777                   | 0.057                        | <b>0.001</b>          | <b>0.001</b>     |                    | <b>0.27 – 0.33</b> | <b>0.3 – 0.36</b> |

|            |       |       |              |              |              |              |                   |
|------------|-------|-------|--------------|--------------|--------------|--------------|-------------------|
| Decoration | 0.912 | 0.289 | <b>0.002</b> | <b>0.001</b> | <b>0.001</b> |              | <b>0.3 – 0.36</b> |
| Morphology | 0.193 | 0.267 | <b>0.001</b> | <b>0.001</b> | <b>0.001</b> | <b>0.001</b> |                   |

NB: Upper diagonal contains the 95% confidence interval for Mantel correlation coefficient ( $r$ ) lower diagonal contains associated  $p$ -values (two-tailed, null hypothesis:  $r = 0$ , lower diagonal); highly significant correlations marked in bold type.

**Supplementary Table 8: Distribution of Jaccard distances (interquartile range)**

|                       | Organic residues | Technology | Morphology | Decoration |
|-----------------------|------------------|------------|------------|------------|
| All sites             | 0.4 – 0.8        | 0.7 – 0.8  | 0.8 – 1    | 0.8 – 1    |
| Baltic                | 0.3 – 0.8        | 0.4 – 0.7  | 0.7 – 1    | 0.7 – 1    |
| E. Forests and steppe | 0.2 – 0.6        | 0.4 – 0.6  | 0.5 – 0.9  | 0.6 – 0.8  |
| Taiga                 | 0.3 – 0.8        | 0.5 – 0.9  | 0.8 – 1    | 0.7 – 1    |
| W. forests and steppe | 0.3 – 0.6        | 0.5 – 0.7  | 0.8 – 1    | 0.6 – 0.9  |

NB: The scale is 0 (identical) to 1 (completely different).

**Supplementary Table 9: Mantel test coefficients with vessels as the unit of analysis**

|            | Organic residues | Technology | Decoration |
|------------|------------------|------------|------------|
| Technology | 0.28             |            |            |
| Decoration | 0.12             | 0.25       |            |
| Form       | 0.14             | 0.36       | 0.10       |

**Supplementary Table 10: Mantel test coefficients limited to major regions**

|                  | Don-Volga region (41 sites) |                  |       |        | Ukraine (28 sites)          |                     |       |        |
|------------------|-----------------------------|------------------|-------|--------|-----------------------------|---------------------|-------|--------|
|                  | GC Distance                 | Organic residues | Tech. | Decor. | GC Distance                 | Organic residues    | Tech. | Decor. |
| Organic residues | -0.14                       |                  |       |        | 0.05 <sup>a</sup>           |                     |       |        |
| Tech.            | 0.15 <sup>a</sup><br>p=0.09 | 0.44             |       |        | 0.26                        | 0.22                |       |        |
| Decor.           | -0.001 <sup>a</sup>         | 0.43             | 0.45  |        | 0.13 <sup>a</sup><br>p=0.14 | -0.005 <sup>a</sup> | 0.20  |        |
| Morph.           | 0.19                        | 0.17             | 0.34  | 0.21   | 0.07 <sup>a</sup>           | 0.18                | 0.26  | 0.25   |

<sup>a</sup> – not significant (p value indicated for higher coefficients)

**Supplementary Table 11 : Mantel test coefficients stratified by vegetation zone**

|                  | Steppe (50 sites) |                  | Forest (37 sites) |                  | Taiga (10 sites)   |                             |
|------------------|-------------------|------------------|-------------------|------------------|--------------------|-----------------------------|
|                  | GC Distance       | Organic residues | GC Distance       | Organic residues | GC Distance        | Organic residues            |
| Organic residues | 0.01 <sup>a</sup> |                  | 0.01 <sup>a</sup> |                  | 0.02 <sup>a</sup>  |                             |
| Technology       | 0.18              | 0.32             | 0.30              | 0.37             | -0.02 <sup>a</sup> | 0.25 <sup>a</sup><br>p=0.08 |
| Decoration       | 0.15              | 0.24             | 0.11              | 0.21             | 0.45               | 0.10 <sup>a</sup><br>p=0.25 |
| Morphology       | 0.18              | 0.21             | 0.23              | 0.26             | -0.06 <sup>a</sup> | 0.41                        |

<sup>a</sup> – not significant (p value indicated for higher coefficients)

**Supplementary Table 12 : Mantel test coefficients for earliest forms only**

|                  | GC Distance        | Residues holding GC distance | Residues | Technology | Decoration |
|------------------|--------------------|------------------------------|----------|------------|------------|
| Organic residues | -0.02 <sup>a</sup> |                              |          |            |            |
| Technology       | 0.23               | 0.27                         | 0.26     |            |            |
| Decoration       | 0.09               | 0.16                         | 0.16     | 0.27       |            |
| Morphology       | 0.18               | 0.16                         | 0.16     | 0.31       | 0.31       |

<sup>a</sup> – not significant



## Supplementary References

1. Silva, F. & Steele, J. New methods for reconstructing geographical effects on dispersal rates and routes from large-scale radiocarbon databases. *J. Archaeol. Sci.* **52**, 609–620 (2014).
2. Silva, F. & Steele, J. Modeling Boundaries Between Converging Fronts In Prehistory. *Adv. Complex Syst.* **15**, 1150005 (2012).
3. Jordan, P. *et al.* Modelling the diffusion of pottery technologies across Afro-Eurasia: emerging insights and future research. *Antiquity* **90**, 590–603 (2016).
4. Bronk Ramsey, C. Bayesian analysis of radiocarbon dates. *Radiocarbon* **51**, 337–360 (2009).
5. Grechkina, T. Y. Vybornov, A. A. Lebedev, Y. S. ЖИЛИЩЕ РАННЕНЕОЛИТИЧЕСКОЙ СТОЯНКИ БАЙБЕК В СЕВЕРНОМ ПРИКАСПИИ (The dwelling at the early Neolithic site of Baybek in the Northern Caspian region). *КРАТКИЕ СООБЩЕНИЯ ИНСТИТУТА АРХЕОЛОГИИ Институт археологии РАН (Brief Reports of the Institute of Archaeology, RAS Moscow)* **262**, 142–155 (2021).
6. Vybornov, A. A. *et al.* Results of excavations at the Algay site in the steppe Volga region in 2020. *ISSCHC* **3**, 100–121 (2021).
7. Bronk Ramsey, C. Dealing with outliers and offsets in radiocarbon dating. *Radiocarbon* **51**, 1023–1045 (2009).
8. Kulkova, M. A., Vybornov, A. A., Yudin, A., Doga, N. & Popov, A. New interdisciplinary research on Neolithic-Eneolithic sites in the Low Volga River region. *Doc. Praehist.* **46**, 376–387 (2019).
9. Yudin, A. I. *et al.* Neolithic site Algay in Low Povolzhye. *Samara Journal of Science* **5**, 61–68 (2016).
10. Courel, B. *et al.* The use of early pottery by hunter-gatherers of the Eastern European forest-steppe. *Quat. Sci. Rev.* **269**, 107143 (2021).
11. Bondetti, M. *et al.* Neolithic farmers or Neolithic foragers? Organic residue analysis of early pottery from Rakushechny Yar on the Lower Don (Russia). *Archaeol. Anthropol. Sci.* **13**, 141 (2021).

12. Bondetti, M. *et al.* Fruits, fish and the introduction of pottery in the Eastern European plain: Lipid residue analysis of ceramic vessels from Zamostje 2. *Quat. Int.* (2019)  
doi:10.1016/j.quaint.2019.05.008.
13. Meadows, J. *et al.* Absolute chronology of Upper Volga-type pottery: More evidence from Zamostje 2. *Samara Journal of Science* **4**, 113–121 (2015).
14. Courel, B. *et al.* Organic residue analysis shows sub-regional patterns in the use of pottery by Northern European hunter-gatherers. *R Soc Open Sci* **7**, 192016 (2020).
15. Liiva, A. & Loze, I. Mesolithic and Neolithic Habitation of the Eastern Baltic. *Radiocarbon* **35**, 503–506 (1993).
16. Liiva, A. & Loze, I. Tartu Radiocarbon Dates XIII. *Radiocarbon* **36**, 153–158 (1994).
17. Loze, I. The Early Neolithic in Latvia. The Narva Culture. *Acta Archaeol.* **63**, 119–140 (1992).
18. Vybornov, A. *et al.* Traits of the Neolithic-Eneolithic archaeological layers' formation at the sites of Algay and Oroschaemoe in the low Volga basin (Low Povoljje). *Acta Geographica Lodziensia* **110**, 49–59 (2020).
19. Librado, P. *et al.* The Evolutionary Origin and Genetic Makeup of Domestic Horses. *Genetics* **204**, 423–434 (2016).
20. Vybornov, A. A. *et al.* About ancient ceramic traditions of the population of the northern Caspian region. *VOLGOGRADSKII GOSUDARSTVENNYI UNIVERSITET-VESTNIK-SERIYA 4-ISTORIYA REGIONOVEDENIE MEZHDUNARODNYE OTNOSHENIYA* **25**, 141–151 (2020).
21. Dolbunova, E. *et al.* Rakushechny Yar site: lacustrine and fluvial deposits, buried soils and shell platforms from 6th mill. BC. *Acta Geographica Lodziensia* **110**, 61–80 (2020).
22. Lozovski, V. M., Lozovskaya, O. V., Zaitceva, G. I. & Possnert, G. Комплекс верхневолжской керамики раннеолитического слоя стоянки Замостье 2: типологический состав и хронологические рамки (Early .... *Самарский научный* (2014).
23. ASTER Global Digital Elevation Map. <https://asterweb.jpl.nasa.gov/gdem.asp>.
24. GRASS Development Team. *Geographic Resources Analysis Support System (GRASS) Software*,

*Version 7.0. Open Source Geospatial Foundation. (2015).*

25. Legendre, P. & Oksanen, M. J. Package ‘lmodel2’. See <https://CRAN.R-project.org/package=lmodel2> (2018).
26. Pinhasi, R., Fort, J. & Ammerman, A. J. Tracing the Origin and Spread of Agriculture in Europe. *PLoS Biol.* **3**, e410 (2005).
27. Bocquet-Appel, J.-P., Naji, S., Vander Linden, M. & Kozłowski, J. Understanding the rates of expansion of the farming system in Europe. *J. Archaeol. Sci.* **39**, 531–546 (2012).
28. Isern, N., Zilhão, J., Fort, J. & Ammerman, A. J. Modeling the role of voyaging in the coastal spread of the Early Neolithic in the West Mediterranean. *Proc. Natl. Acad. Sci. U. S. A.* **114**, 897–902 (2017).
29. Fort, J. & Pareda, M. M. Long-distance dispersal effects and Neolithic waves of advance. *J. Archaeol. Sci.* (2020).
30. Fort, J., Mercè Pareda, M. & Sørensen, L. Estimating the relative importance of demic and cultural diffusion in the spread of the Neolithic in Scandinavia. *J. R. Soc. Interface* **15**, 20180597 (2018).
31. Russell, T., Silva, F. & Steele, J. Modelling the Spread of Farming in the Bantu-Speaking Regions of Africa: An Archaeology-Based Phylogeography. *PLoS One* **9**, e87854 (2014).
32. Jerardino, A., Fort, J., Isern, N. & Rondelli, B. Cultural Diffusion Was the Main Driving Mechanism of the Neolithic Transition in Southern Africa. *PLoS One* **9**, e113672 (2014).
33. Bryant, D. & Moulton, V. Neighbor-net: an agglomerative method for the construction of phylogenetic networks. *Mol. Biol. Evol.* **21**, 255–265 (2004).
34. Wood, S. N. Thin plate regression splines. *J. R. Stat. Soc. Series B Stat. Methodol.* **65**, 95–114 (2003).
